---

# Dynamics of the cell fate specifications during female gametophyte development in *Arabidopsis*

---

A bioRxiv PREPRINT

Daichi Susaki<sup>1</sup>, Takamasa Suzuki<sup>2</sup>, Daisuke Maruyama<sup>1</sup>, Minako Ueda<sup>3,4</sup>, Tetsuya Higashiyama<sup>3,4,5,\*</sup>, and Daisuke Kurihara<sup>3,6,\*</sup>

<sup>1</sup>Kihara Institute for Biological Research, Yokohama City University, Yokohama, Japan

<sup>2</sup>Department of Biological Chemistry, College of Bioscience and Biotechnology, Chubu University, Kasugai, Japan

<sup>3</sup>Institute of Transformative Bio-Molecules (ITbM), Nagoya University, Nagoya, Japan

<sup>4</sup>Division of Biological Science, Graduate School of Science, Nagoya University, Nagoya, Japan

<sup>5</sup>Department of Biological Sciences, Graduate School of Science, University of Tokyo, Tokyo, Japan

<sup>6</sup>JST, PRESTO, Nagoya, Japan

April 8, 2020

## ABSTRACT

The female gametophytes of angiosperms contain cells with distinct functions, such as those that enable reproduction via pollen tube attraction and fertilization. Although the female gametophyte undergoes unique developmental processes, such as several rounds of nuclear division without cell plate formation, and the final cellularization, it remains unknown when and how the cell fate is determined during their development. Here, we visualized the living dynamics of female gametophyte development and performed transcriptome analysis of its individual cell types, to assess the cell fate specifications in *Arabidopsis thaliana*. We recorded time lapses of the nuclear dynamics and cell plate formation from the one-nucleate stage to the seven-cell stage after cellularization, using the *in vitro* ovule culture system. The movies showed that the nuclear division occurred along the micropylar–chalazal axis. During cellularization, the polar nuclei migrated while associating with forming edge of the cell plate. Then, each polar nucleus migrated to fuse linearly towards each other. We also tracked the gene expression dynamics and identified that the expression of the *MYB98pro::GFP*, a synergid-specific marker, was initiated before cellularization, and then restricted to the synergid cells after cellularization. This indicated that cell fates are determined immediately after cellularization. Transcriptome analysis of the female gametophyte cells of the wild type and *myb98* mutant, revealed that the *myb98* synergid cells had the egg cell-like gene expression profile. Although in the *myb98*, the egg cell-specific gene expressions were properly initiated only in the egg cells after cellularization, but subsequently expressed ectopically in one of the two synergid cells. These results, together with the various initiation timings of the egg cell-specific genes suggest the complex regulation of the individual gametophyte cells, such as cellularization-triggered fate initiation, MYB98-dependent fate maintenance, cell morphogenesis, and organelle positioning. Our system of live-cell imaging and cell-type-specific gene expression analysis provides insights into the dynamics and mechanisms of cell fate specifications in the development of female gametophytes in plants.

**Keywords** Arabidopsis · cell fate specification · female gametophyte · live-cell imaging · transcriptome

## 1 Introduction

1 In multicellular organisms, each differentiated cell creates  
2 complex structures to perform its specified functions. As  
3 cells differentiate according to their cell fate, it is impor-  
4 tant for the cell fate to be determined at the appropriate

time and position. However, the molecular mechanisms  
that determine how cells recognize positional information  
and their cell fate in plants are not well understood. The  
development of the female gametophyte in angiosperms is  
of interest when studying cell fate specifications, as they  
are essential for cell differentiation in plants.

1  
2  
3  
4  
5  
6

DYNAMICS OF THE CELL FATE SPECIFICATIONS DURING FEMALE GAMETOPHYTE DEVELOPMENT IN *Arabidopsis*

1 The female gametophytes in angiosperms contain highly  
2 differentiated cells with distinct functions, those for such  
3 as pollen tube attraction and fertilization, which enable  
4 plant reproduction. In *Arabidopsis thaliana*, one megas-  
5 pore undergoes three rounds of mitosis without cytokinesis  
6 as a coenocyte. Cellularization occurs almost simultane-  
7 ously around each nucleus, producing the *Polygonum*-type  
8 female gametophyte with eight nuclei and seven cells: one  
9 egg cell, one central cell, two synergid cells, and three  
10 antipodal cells. It is important for the sexual reproduction  
11 of angiosperms that each cell of the female gametophyte  
12 develops by acquiring its appropriate cell fate. Although it  
13 remains unknown when and how the cell fate is determined  
14 during female gametophyte development, two mechanisms  
15 are thought to play important roles: cell polarity along  
16 the micropyle–chalazal axis in the female gametophyte  
17 and cell–cell communications after cellularization. The  
18 female gametophytes of angiosperms develops with distinct  
19 polarity. In many plant species, the egg cell and the  
20 synergid cells form at the micropylar end of the ovule, and  
21 the antipodal cells form at the opposite side of the chalazal  
22 end (Maheshwari, 1950; Yadegari and Drews, 2004).

23 The egg cell is the intrinsic female gamete that forms  
24 the embryo in the seeds by fertilization with the sperm cell  
25 carried by the pollen tube. The central cell is the largest  
26 in the female gametophyte, and often contains multiple  
27 nuclei during cellularization. In the case of *Polygonum*  
28 type female gametophytes, the central cell contains two  
29 nuclei (Schmid et al., 2015). The central cell is regarded as  
30 one of the gametes because it fertilizes the sperm cell, but  
31 the fertilized central cell forms the embryo-nursing tissue  
32 endosperm in the seed, and it is not inherited in the next  
33 generation. The synergid cells have a morphology thought  
34 to be specialized for secretion. The synergid cell has finger-  
35 like plasma membrane invaginations with thickened cell  
36 walls termed "filiform apparatus" in the micropylar end.  
37 This structure increases the surface area of the synergid  
38 cells with a higher rate of exocytosis for secretion. When  
39 the pollen tube arrives at the synergid cells, the synergid  
40 cells stop elongation of the pollen tube and cause the re-  
41 lease of sperm cells by rupturing its tip (Higashiyama,  
42 2002).

43 These three cell types are highly common among an-  
44 giosperm species and are essential for sexual reproduction.  
45 Except for the antipodal cells, the set of the egg cell, the  
46 central cell, and the synergid cells have been designated as  
47 "egg apparatus" that are essential for sexual reproduction  
48 (Huang and Russell, 1992). In contrast, the function of  
49 the antipodal cells is poorly understood and varies widely  
50 among plant species (Diboll and Larson, 1966; Maeda and  
51 Miyake, 1997; An and You, 2004; Holloway and Friedman,  
52 2008; Heydlauff and Groß-Hardt, 2014). For example, it  
53 has been found that the antipodal cells degenerated by pro-  
54 grammed cell death as the female gametophytes mature in  
55 *Arabidopsis* and *Torenia fournieri* (Yadegari and Drews,  
56 2004; Mól, 1986). However, other report has suggested  
57 that antipodal cells did not degenerate but persisted beyond  
58 fertilization in *Arabidopsis* (Song et al., 2014).

1 Mutant screening and gene expression analysis are two  
2 major approaches to explore the factors responsible for  
3 their cell fates. Large-scale mutant screenings have been  
4 carried out with mutagenesis by T-DNA insertions or trans-  
5 posons, to identify the genes required for female gameto-  
6 phyte development (reviewed in Brukhin et al. 2005). For  
7 instance, *lachesis* and *eostre* were reported as the mutants  
8 whose synergid cell fates changed to egg cell-like (Groß-  
9 Hardt et al., 2007; Pagnussat et al., 2007). On the other  
10 hand, several reverse genetic investigations, based on gene  
11 expression analysis, reported the identification of impor-  
12 tant genes which had cell-type specific functions. First,  
13 the gene expression comparisons between the ovules, with  
14 or without the female gametophyte, identified *MYB98*, a  
15 synergid specific transcription factor in *Arabidopsis* (Kasa-  
16 hara et al., 2005). Further analysis, including *myb98*  
17 ovules compared to controls clarified the putative female  
18 gametophyte-specific gene cluster controlled by *MYB98*  
19 (Yu et al., 2005; Jones-Rhoades et al., 2007; Steffen et al.,  
20 2007). The pollen tube attractants, *ZmEA1* and *TfLUREs*,  
21 were identified in gene expression analysis of maize egg  
22 cells and the *Torenia* synergid cells (Márton et al., 2005;  
23 Okuda et al., 2009; Márton et al., 2012).

24 The technology and techniques for the gene expression  
25 analyses of the female gametophytes have advanced over  
26 time. Initially, RT-PCR-based screenings were performed  
27 with the ovules of the wild type or the female gametophyte  
28 mutants (Kasahara et al., 2005). Then, microarray analyses  
29 were developed for use with the ovules of a wild-type and  
30 the mutants without the female gametophyte or *myb98* in  
31 *Arabidopsis* (Yu et al., 2005; Jones-Rhoades et al., 2007;  
32 Steffen et al., 2007). Further detailed gene expression  
33 analyses in each type of cell have been reported, such as  
34 the expressed sequence tag analysis for the protoplasts of  
35 the maize and wheat egg cells and the *Torenia* synergid  
36 cells (Sprunck et al., 2005; Márton et al., 2005; Okuda  
37 et al., 2009). The protoplasts of rice egg and synergid cells  
38 and the *Arabidopsis* egg cells, synergid cells, and central  
39 cells, which were collected by laser-assisted microdissec-  
40 tion (LAM), were analyzed with a microarray (Ohnishi  
41 et al., 2011; Wuest et al., 2010). These studies showed the  
42 genome-wide gene expression profiles of each cell-type in  
43 the rice and mature *Arabidopsis* ovules. In recent years,  
44 RNA-sequencing (RNA-seq) has become a major technol-  
45 ogy in transcriptomics. In plant reproduction research, the  
46 protoplasts of rice egg cells, sperm cells, and pollen veg-  
47 etative cells and the protoplasts of *Arabidopsis* egg cells,  
48 zygotes in their early stages, embryos, and the central cells  
49 collected by LAM, have been investigated by RNA-seq  
50 (Anderson et al., 2013; Zhao et al., 2019; Schmid et al.,  
51 2012). These reports have demonstrated that RNA-seq  
52 could detect greater levels of gene expression than mi-  
53 croarrays and the genome-wide gene expression profiles at  
54 higher resolutions. From these studies, the characteristics  
55 of each female gametophyte cells have been identified, and  
56 the genes responsible for each cells function have gradually  
57 been elucidated.

1 As described above, the two major methods of sample  
2 collection to analyze the female gametic transcriptome  
3 were LAM or manual isolation of the protoplasts. Proto-  
4 plasts collection was technically challenging and had lower  
5 costs (Wuest et al., 2013) but was expected to extract more  
6 RNA as it used living cells. The protoplast isolation of  
7 female gametophyte cells was previously reported in many  
8 species (Theunis et al. 1991; *Torenia fournieri*, Mól 1986;  
9 *Plumbago zeylanica*, Huang and Russell 1989; *Zea mays*,  
10 Kranz et al. 1991; *Oryza sativa* Uchiumi et al. 2006). In  
11 most studies, female gametophyte cells were isolated with  
12 the enzyme solution containing cellulase. The optimized  
13 conditions of the enzyme solution were different for dif-  
14 ferent plant species (Kawano et al., 2011). The cell-type  
15 specific RNA-seq, including the mutants defective in fe-  
16 male gametophyte cell function, must be powerful tools  
17 to reveal the precise gene expression changes associated  
18 with each cell functions or specifications. Convenient and  
19 simple methods for cell isolation enabled these analyses.

20 Genes expressed specifically in each female gameto-  
21 phyte cell and used as markers of the cell fate have been  
22 identified in several plants, particularly *Arabidopsis* (Tek-  
23 leyohans et al., 2017). However, it is not clear when and  
24 how these cells specify their cell fates and exhibit specific  
25 gene expressions. The mutant analysis shows a strict cor-  
26 relation between nuclear position and cell fate (Kong et al.,  
27 2015; Groß-Hardt et al., 2007; Pagnussat et al., 2007; Moll  
28 et al., 2008; Kirioukhova et al., 2011). It is still unknown  
29 whether the nuclear positions determine the cell fates or  
30 not, due to little spatio-temporal information on the de-  
31 tailed nuclear dynamics and cell fate specifications. As the  
32 female gametophyte development occurs deep within the  
33 female pistil, it has been challenging to observe directly in  
34 the living state. Therefore, the intracellular behavior of the  
35 female gametophyte development has been analyzed by  
36 fixing the ovules and observing the sections. It is crucial to  
37 capture the living dynamics in the female gametophyte de-  
38 velopment to reveal the dynamics of cell fate specification.

39 Here, we performed live-cell imaging of the female ga-  
40 metophytes development in *Arabidopsis* using the *in vitro*  
41 ovule culture system, which enabled us to observe the nu-  
42 clear dynamics, division, cellularization, and cell fate spec-  
43 ifications in real-time, by using specific fluorescent marker  
44 lines. Subsequently, we established a method for the isola-  
45 tion of each female gametophyte cells with high efficiency,  
46 without contaminating the other cells in *Arabidopsis*. We  
47 then built a technology platform for transcriptome analysis  
48 using a next-generation sequencer for a small number of  
49 isolated female gametophyte cells. Furthermore, we ana-  
50 lyzed the contributions of the cell-cell communications in  
51 changing the gene expressions, by analyzing the expres-  
52 sion profiles of the synergid cells of the *myb98* mutant,  
53 a transcription factor that is thought to contribute to the  
54 determination of the synergid cell fate.

## 2 MATERIALS AND METHODS

For all experiments, the *Arabidopsis thaliana* acces-  
2 sion Columbia (Col-0) was used as the wild type. 3  
The following transgenic lines were previously de- 4  
scribed: *RPS5Apro::H2B-tdTomato* (Adachi et al., 5  
2011), *RPS5Apro::tdTomato-LTI6b* (Mizuta et al., 2015), 6  
*RPS5Apro::H2B-sGFP* (Maruyama et al., 2015), *FGR8.0* 7  
(Völz et al., 2013), *MYB98pro::GFP* (Kasahara et al., 8  
2005), *EC1.2pro::mtKaede* (Hamamura et al., 2011), 9  
*FWApro::FWA-GFP* (Kinoshita et al., 2004), and 10  
*ABI4pro::H2B-tdTomato* (Kimata et al., 2016). 11

*Arabidopsis* seeds were sown on plates containing half- 12  
strength Murashige and Skoog salts (Duchefa Biochemie, 13  
Haarlem, The Netherlands), 0.05% MES-KOH (pH 5.8), 14  
1 × Gamborg's vitamin solution (Sigma, St Louis, MO, 15  
USA), and 1% agar. The plates were incubated in a growth 16  
chamber at 22°C under continuous lighting after cold treat- 17  
ments at 4°C for 2–3 days in the dark. Two-week-old 18  
seedlings were transferred to soil and grown at 21 to 25°C 19  
under long-day conditions (16-h light/8-h dark). 20

### 2.1 Plasmid Construction

The *GPR1pro::H2B-mNeonGreen* (coded as DKv1200), 22  
was constructed with the 2,568 bp upstream regions of 23  
*GPR1* (At3g23860) and the full-length coding region of 24  
*H2B* (HTB1: At1g07790), fused to the *mNeonGreen* (Al- 25  
lele Biotechnology, San Diego, CA) with the (SGGGG)<sub>2</sub> 26  
linker, and the 1,959 bp downstream regions were cloned 27  
into the binary vector pPZP211 (Hajdukiewicz et al., 1994). 28  
The *CDR1-LIKE2pro::CDR1-LIKE2-mClover* (coded as 29  
DKv1023) was constructed using the 1,398 bp upstream 30  
regions and the full-length coding region of *CDR1-LIKE2* 31  
(At1g31450), fused to the *mClover* with the (SGGGG)<sub>2</sub> 32  
linker, and the *NOS* terminator, and cloned into the binary 33  
vector pPZP211. The *CDR1-LIKE1pro::CDR1-LIKE1- 34*  
*mClover* (coded as DKv1024) was constructed using the 35  
2,000 bp upstream regions and the full-length coding re- 36  
gion of *CDR1-LIKE1* (At2g35615) fused to the *mClover* 37  
with the (SGGGG)<sub>2</sub> linker and the *NOS* terminator, and 38  
then cloned into the binary vector pPZP211. Finally, the 39  
*CDR1pro::CDR1-mClover* (coded as DKv1025) was con- 40  
structed with the 1,577 bp upstream regions and the full- 41  
length coding region of *CDR1* (At5g33340) fused to the 42  
*mClover* with the (SGGGG)<sub>2</sub> linker, and the *NOS* termina- 43  
tor, cloned into the binary vector pPZP211. 44

To construct the multiple cell-type-specific marker line 45  
with the nuclei marker (coded as DKv1110), the following 46  
sequences were cloned into the binary vector pPZP211 and 47  
the *NPTII* replaced with *mCherry* under the control of the 48  
*At2S3* promoter from a pAlligator-derived binary vector 49  
(Kawashima et al., 2014): *EC1.1pro::SP-mTurquoise2- 50*  
*CTPP* (Kimata et al., 2019) (the 463 bp *EC1.1* promoter 51  
was fused to *mTurquoise2* that fused to the signal peptide 52  
(SP) sequence of *EXGT-A1* (At2g06850) at the N-terminus 53  
and to a vacuolar sorting signal COOH-terminal propeptide 54  
(CTPP), and the *HSP* terminator); *DD1pro::ermTFPI* (the 55

## DYNAMICS OF THE CELL FATE SPECIFICATIONS DURING FEMALE GAMETOPHYTE DEVELOPMENT IN *Arabidopsis*

1 1,262 bp *DD1* promoter (At1g36340) was fused to mTFP1  
2 that was fused to the SP sequence of *EXGT-A1* at the  
3 N-terminus and to an ER-retention signal (HDEL) at the C-  
4 terminus, and the *OCS* terminator); *MYB98pro::mRuby3-*  
5 *LTI6b* (the 1,610 bp *MYB98* promoter and *mRuby3* fused to  
6 the start codon of *LTI6b* (At3g05890) with the (SGGGG)<sub>2</sub>  
7 linker, and the *HSP* terminator); *AKVpro::H2B-mScarlet-*  
8 *I* (the 2,949 bp upstream regions of *AKV* (At4g05440;  
9 Boissard-Lorig et al., 2001) and the full-length coding  
10 region of *H2B* (HTB1: At1g07790) fused to *mScarlet-I*  
11 with the (SGGGG)<sub>2</sub> linker).

12 *SBT4.13pro::SBT4.13-mClover* (coded as pDM349);  
13 The 2,040 bp upstream region and the full-length coding  
14 region of *SBT4.13* (At5g59120) were amplified and cloned  
15 into the pPZP221Clo using SmaI site (Takeuchi and Hi-  
16 gashiyama, 2016).

17 *MYB98pro::NLS-mRuby2* (coded as pDM371), a DNA  
18 fragment of NLS-mRuby2 (obtained from Addgene plas-  
19 mid 40260), was amplified and then cloned into the  
20 pENTR/D-TOPO vector (Invitrogen, Japan), to gener-  
21 ate pOR006. LR recombinations between the pDM286  
22 (Maruyama et al., 2015) and pOR006 were performed us-  
23 ing the LR clonaseII (Invitrogen) to produce pDM371.

24 The binary vectors were introduced into the *Agrobac-*  
25 *terium tumefaciens* strain EHA105. The floral-dip or sim-  
26 plified *Agrobacterium*-mediated methods were used for the  
27 *Arabidopsis* transformations (Narusaka et al., 2010).

## 28 2.2 Microscopy

29 To image the female gametophyte development, we used  
30 two spinning-disk confocal microscope systems follow-  
31 ing the settings of Gooh et al. (2015), with the following  
32 modification: For the live imaging of the *in vitro* female  
33 gametophyte development, the confocal images were ac-  
34 quired using an inverted fluorescence microscope (IX-83;  
35 Olympus), equipped with an automatically programmable  
36 XY stage (BioPrecision2; Ludl Electronic Products Ltd,  
37 Hawthorne, NY, USA), a disk-scan confocal system (CSU-  
38 W1; Yokogawa Electric), 488-nm and 561-nm LD lasers  
39 (Sapphire; Coherent), and an EMCCD camera (iXon3 888;  
40 Andor Technologies, South Windsor, CT, USA). Time  
41 lapse images were acquired with a 60× silicone oil im-  
42 mersion objective lens (UPLSAPO60XS, WD = 0.30 mm,  
43 NA = 1.30; Olympus) mounted on a Piezo focus drive (P-  
44 721; Physik Instrumente). We used two band-pass filters,  
45 520/35 nm for the GFP, and 593/46 nm for the tdTomato.  
46 The images were processed with Metamorph (Universal  
47 Imaging Corp.) and Fiji (Schindelin et al., 2012) to create  
48 maximum-intensity projection images and to add color.

49 We also used an inverted confocal microscope system  
50 with a stable incubation chamber (CV1000; Yokogawa  
51 Electric) equipped with 488 nm and 561 nm LD lasers  
52 (Yokogawa Electric), and an EMCCD camera (ImagEM 1K  
53 C9100-14 or ImagEM C9100-13; Hamamatsu Photonics,  
54 Shizuoka, Japan). Time lapse images were acquired with  
55 a 40× objective lens (UPLSAPO40×, WD = 0.18 mm,

NA = 0.95; Olympus). We used the two band-pass filters,  
520/35 nm for the GFP, and 617/73 nm for the tdTomato.

## 2.3 Isolation of female gametophyte cells

We used an inverted fluorescence microscope (IX-71;  
Olympus, Japan) equipped with a three-charge-coupled de-  
vice (CCD) digital camera (C7780; Hamamatsu Photonics  
Ltd., Japan). Images were acquired using a 40× objec-  
tive lens (LUCPlanFl 40×, WD = 2.7–4 mm, NA = 0.60;  
Olympus). The unfertilized ovules of each cell marker line  
were treated with enzyme solution (1 % cellulase [Wor-  
thington, USA], 0.3 % macerozyme R-10 [Yakult, Japan],  
0.05 % pectolyase [Kyowa Kasei, Japan], and 0.45 M man-  
nitol [pH 7.0]). To collect the target cells, we used a mi-  
cromanipulator (MN-4, MO-202U; Narishige, Japan) and  
micropipette (Picopipet HR; Nepa Gene, Japan) with glass  
capillaries (G-1; Narishige, Japan), which were pulled  
with a micropipette puller (P-97; Sutter, USA) (Ikeda et al.,  
2011).

## 2.4 cDNA preparation and library construction for sequencing

The mRNA was extracted from 12–18 synergid, egg, and  
central cells with Dynabeads mRNA DIRECT Micro Kit  
(Invitrogen, USA). Extracted mRNA were amplified us-  
ing Ovation RNA-seq System V2 (NuGEN, USA). The  
RNA-seq libraries were prepared using a TruSeq RNA  
Sample Preparation Kit and Multiplexing Sample Prepa-  
ration Oligonucleotide Kit (Illumina, USA). The libraries  
were sequenced on an Illumina GAIIx (Illumina) using 36  
bp single-end reads.

## 2.5 RNA-seq data analysis

Reads were filtered by fastp (ver. 0.20.0; (Chen et al.,  
2018)). The cleaned reads were mapped to the *Arabidopsis*  
reference genome TAIR10, using HISAT2 (ver. 2.1.0; Kim  
et al. (2019)). The expression level for each gene was quan-  
tified as the read count and TPM with Stringtie (ver. 2.1.1;  
Pertea et al. (2015, 2016)). Differentially expressed genes  
between the synergid cells of the wild type and the *myb98*  
mutant were identified by TCC with a false discovery rate  
< 0.01 (ver. 1.24.0; Sun et al. (2013)). The TCC+baySeq  
(ver. 2.18.0) method with a false discovery rate < 0.01 was  
used for the identification of the differentially expressed  
genes among the synergid, egg, and central cells of the  
wild type (Osabe et al., 2019). Hierarchical clustering of  
the gene expression data was carried out using phylogram  
package (<https://github.com/rambaut/figtree/>).

## 3 RESULTS

### 3.1 Live imaging of the nuclear dynamics during female gametophyte development

The development of female angiosperm gametophytes *in vivo*, occurred within multiple layers of the maternal tis-

DYNAMICS OF THE CELL FATE SPECIFICATIONS DURING FEMALE GAMETOPHYTE DEVELOPMENT IN *Arabidopsis*

1 sues of the flower. Christensen et al. (1997) defined the  
2 developmental stage by the observation of the fixed ovules  
3 (Figure 1A). Stage FG1 is the one-nucleate stage. Then the  
4 functional megaspore divided into two nuclei, without cy-  
5 tokinesis, during the first mitosis leading to the FG2 stage.  
6 A large vacuole then appeared at the center of the female  
7 gametophyte, separating the two nuclei to the micropylar  
8 and chalazal ends in the FG3 stage. After the second mitosis,  
9 the chalazal and micropylar nuclei migrated a line that  
10 is orthogonal to the chalazal–micropylar axis, at the early  
11 FG4 stage. The chalazal and micropylar nuclei migrated  
12 along a line that is parallel to the chalazal–micropylar axis  
13 at the late FG4 stage. After the third mitosis, the eight  
14 nuclei coenocyte is cellularized into the seven-celled fe-  
15 male gametophyte in the FG5 stage. At the FG6 stage,  
16 the two polar nuclei fused to produce the secondary nu-  
17 cleus. Finally, the mature female gametophyte has two  
18 synergids, an egg cell, a central cell, and three antipodal  
19 cells. To investigate the actual developmental time course  
20 of the female gametophyte, we performed live-cell imag-  
21 ing of the female gametophytes development using the  
22 previously developed the *in vitro* ovule culture system for  
23 embryogenesis, using *Arabidopsis* (Gooh et al., 2015).

24 To observe the nuclear dynamics in the female game-  
25 topytes development, we constructed GPR1pro::H2B-  
26 mNeonGreen::GPR1ter (Figure 1B, Supplementary Movie  
27 1). GPR1 (GTP-BINDING PROTEIN RELATED1) was  
28 previously found to be expressed in the megaspore mother  
29 cells (i.e., at stage FG0) and the female gametophytes at  
30 FG1 – FG7 (Yang et al., 2017). At FG1, the nucleus was  
31 located at the center of the female gametophyte (Figure  
32 1B; 0:00). Approximately 3 hr after the observation, the  
33 nucleus divided into two during the first mitosis (Figure  
34 1B; 3:15). At FG2, the two nuclei were positioned at the  
35 center of the female gametophyte. Approximately 8 hr  
36 after the start of the FG2, each nucleus moved to the oppo-  
37 site ends of the ovule (Figure 1B; 12:00), at which point  
38 the vacuole may appear (FG3) (Christensen et al., 1997).  
39 After the second mitosis, the nuclei divided to lie in an  
40 orthogonal line along the chalazal–micropylar axis (Figure  
41 1B; 13:00, 13:25). The chalazal nuclei migrated along a  
42 line that was parallel to the chalazal–micropylar axis (Fig-  
43 ure 1B; 14:20), while the micropylar nuclei migrated along  
44 the surface of the female gametophyte, not parallel to the  
45 chalazal–micropylar axis (Figure 1B; 15:45, 18:40). The  
46 micropylar nuclei tended to lie along the abaxial surface  
47 of the female gametophytes (52/62, 84%). After the end  
48 of the third mitosis, the polar nuclei migrated linearly, not  
49 along the surface of the female gametophyte, towards each  
50 other to fuse (Figure 1B; 20:40, 24:00). We calculated  
51 the duration of each nuclear division from 30 movies of  
52 GPR1pro::H2B-mNeonGreen (n = 19), RPS5Apro::H2B-  
53 tdTomato (n = 10), and RPS5Apro::H2B-sGFP (n = 1)  
54 (Figure 1C). The duration of the second and third nuclear  
55 divisions were  $11.8 \pm 3.3$  hr (mean  $\pm$  standard deviation;  
56 n = 9, Figure 1C; FG2,3) and  $8.1 \pm 1.2$  hr (n = 26, Figure  
57 1C; FG4), respectively. After cellularization, it took  $4.5 \pm$   
58  $1.4$  hr (n = 27) and  $13.0 \pm 3.6$  hr (n = 9, Figure 1C; FG5)

after the third mitosis, for the polar nuclei to attach and  
fuse, respectively. Thus, the normal female gametophyte  
development was observed using the *in vitro* ovule culture  
system (Christensen et al., 1997).

### 3.2 Live imaging of the plasma membrane formation during female gametophyte development

To analyze the morphological changes in the female game-  
tophytes, we observed their plasma membranes by labeling  
them with RPS5Apro::tdTomato-LTI6b (Figure 2A, Sup-  
plementary Movie 2). The female gametophytes were  
located at the center of the ovule in the early stages of the  
female gametophyte development (Figure 2A; -17:20).  
The female gametophytes showed polar elongation to-  
wards the micropylar ends of the ovule (Figure 2A;  
-17:20, -11:00, -5:00). The fluorescent signals of the  
RPS5Apro::tdTomato-LTI6b were detected in the plasma  
membranes of the female gametophytes during cellulariza-  
tion (Figure 2A; 0:00, arrow). Cellularization of the egg  
and synergid cells finished after 45 min and 1 hr 55 min,  
respectively (Figure 2A). The time differences between the  
cellularization of the egg and the synergid cells was  $0.8 \pm$   
 $0.2$  hr (n = 10; Figure 2B). After the cellularization, the  
egg and synergid cells were elongated towards the chalazal  
end (Figure 2A; 3:50, 7:35). It took  $4.0 \pm 0.6$  hr (n = 10)  
from the completion of the cellularization to the start of  
the elongation (Figure 2B).

To analyze the relationship of the nuclear dynamics  
and the plasma membrane formation during the cellu-  
larization, we observed the RPS5Apro::tdTomato-LTI6b,  
RPS5Apro::H2B-sGFP ovule at the beginning of FG5  
(Figure 2C, Supplementary Movie 3). In the case of the  
micropylar end, the fluorescent signals of the tdTomato-  
LTI6b were detected at the side nearest the nuclei, that  
gives rise to the polar nucleus and the egg nucleus after  
cellularization (Figure 2C; 0:40). This fluorescent signal  
was elongated to the opposite sides of the cell membranes  
of the female gametophytes. The polar nuclei migrated  
toward the opposite sides along with the plasma membrane  
formation (Figure 2C; 0:40 – 1:40). In the case of the cha-  
lazal end, the fluorescent signals of the tdTomato-LTI6b  
were also detected between the polar nucleus and the an-  
tipodal nucleus (Supplementary Movie 3, later). Thus, the  
dynamics of the plasma membrane formation were similar  
at the micropylar and chalazal ends.

During the maturation of the female gametophyte cells  
at the FG5 and FG6 stages, the central cell showed pol-  
ar elongation towards the chalazal end of the ovule (Fig-  
ure 2D, Supplementary Movie 4). A bright field movie  
showed that the central cell elongated by collapsing the  
chalazal regions of the ovule (Supplementary Movie 4).  
This direction of the elongation was the opposite to that  
of the FG2 – FG4 (Figure 2A; -17:20, -11:00, -5:00). As  
shown in Supplementary Movie 4, the antipodal cells ap-  
peared to be collapsing during the maturation of the central  
cell. However, we could not determine whether the an-

DYNAMICS OF THE CELL FATE SPECIFICATIONS DURING FEMALE GAMETOPHYTE DEVELOPMENT IN *Arabidopsis*

1 tipodal cells degenerate or not, i.e., whether they reached  
2 FG7 (four-celled stage) or not (Song et al., 2014) in the  
3 *RPS5Apro::tdTomato-LTI6b*. Although we could not ob-  
4 serve the signature of FG7, such as degeneration of the  
5 antipodal cells, our *in vitro* culture system could monitor  
6 the entire development of the female gametophyte.

### 7 3.3 Live imaging of cell fate specification during 8 female gametophyte development

9 The transcriptome data of the mature ovules indicated that  
10 each female gametophyte cell had specific gene expres-  
11 sions (Yu et al., 2005; Jones-Rhoades et al., 2007; Steffen  
12 et al., 2007). To investigate the initiation timing of the cell  
13 fate specification, we observed the mitochondria marker,  
14 the *EC1.2pro::mtKaede* (Hamamura et al., 2011), in the  
15 ovules of the egg cells and the *MYB98pro::GFP* (Kasahara  
16 et al., 2005) ovules of the synergid cells (Figure 3A,B,  
17 Supplementary Movie 5, 6). The fluorescent signals of the  
18 *EC1.2pro::mtKaede* were detected in the egg cells before  
19 their elongation (Figure 3A; 0:00). Considering that the  
20 duration from egg cell cellularization to egg cell elonga-  
21 tion was about 4 hr (Figure 2B), the *EC1.2* expression  
22 was initiated less than 4 hr after egg cell cellularization  
23 (Figure 2B). After 15.5 hrs, the fluorescent signals of the  
24 *ABI4pro::H2B-tdTomato* were detected in the nucleus of  
25 the egg cell (Figure 3A; 21:10, arrowhead). Since MYB98  
26 is an essential transcription factor for synergid cell func-  
27 tion, the expression of MYB98 was predicted to begin  
28 after the synergid cells became cellularized; however, the  
29 fluorescent signals of the *MYB98pro::GFP* were detected  
30 in the 4-nucleate female gametophytes at FG4, before the  
31 third mitosis and cellularization (Figure 3B; -3:10). After  
32 the cellularization, the fluorescent intensities of the GFP  
33 signals were increased in all of female gametophyte cells  
34 (Figure 3B; 0:40). As the cells mature, the GFP signals  
35 were decreased in the egg, central, and the antipodal cells,  
36 while they were increased in the synergid cells (Figure 3B;  
37 8:20).

38 To determine when the expression of each cell-specific  
39 marker began after cellularization, we utilized the female  
40 gametophyte-specific markers *FGR8.0* (Völz et al., 2013)  
41 and *RPS5Apro::tdTomato-LTI6b* (Figure 3C, Supplemen-  
42 tary Movie 7). After cellularization (Figure 3C; 0:00) and  
43 elongation of the egg and synergid cells (Figure 3C; 5:30),  
44 the *EC1.1pro::NLS-3xDsRed2* and *LURE1.2pro::NLS-3xGFP*  
45 signals were detected in the egg and synergid cells,  
46 respectively in *FGR8.0* (Figure 3C; 6:30). It took  $5.9 \pm 2.0$   
47 hr ( $n = 5$ ) for the *EC1.1pro::NLS-3xDsRed2* to be detected  
48 after the completion of the cellularization (Figure 3D).  
49 Considering that the expression of the *EC1.2pro::mtKaede*  
50 was initiated before the egg cell elongation (Figure 3A),  
51 the detection of the NLS marker was slower than that of  
52 the mitochondrial marker.

53 To investigate the correlation between the timing of the  
54 expressions of each cell-specific markers at the FG5, we  
55 used the multiple cell-type-specific marker line (Figure 3E,  
56 Supplementary Movie 8). We changed the target signals of

the new markers from the NLS and the fluorescent proteins  
as detection may have been slow. The cell-specific markers  
of the egg cell (*EC1.1pro::SP-mTurquoise2-CTPP*) and  
the antipodal cells (*DD1pro::ermTFP1*) were expressed  
1.7 hr after cellularization (Figure 3E; 1:40). This was  
before the egg and synergid cell elongations and the polar  
nuclei migrations. These results suggested that each cell  
fate was specified almost immediately after cellularization  
at the eight-nucleate stage.

### 9 3.4 *myb98* synergid cells showed aberrant 10 morphology and subcellular dynamics 11

12 MYB98 is required for the formation of the filiform ap-  
13 paratus during the synergid cell differentiation and the  
14 expression of the AtLURE1 peptides to attract the pollen  
15 tube (Kasahara et al., 2005; Takeuchi and Higashiyama,  
16 2012). However, *MYB98pro::GFP* was detected before  
17 cellularization in FG4 and all of the female gametophyte  
18 cells in FG5 (Figure 3B). To clarify the effects of the  
19 MYB98 transcription factor on the female gametophyte  
20 specifications, we observed the morphology and nuclear  
21 dynamics with the promoter activity of the *MYB98* in the  
22 synergid cells of the wild type and *myb98* mutant ovules  
23 (Figure 4, Supplementary Movie 9, 10). The fluores-  
24 cent signals of the *MYB98pro::NLS-mRuby2* were also  
25 detected in all of the female gametophyte cells, as well  
26 as the synergid cells of the wild type and *myb98* ovules.  
27 However, the *MYB98pro::NLS-mRuby2* signals were de-  
28 tected during the synergid cell elongation, later than the  
29 *MYB98pro::GFP*. These results indicated that the expres-  
30 sion of NLS-mRuby2 was slower than that of the free GFP.  
31 Detection of *RPS5Apro::tdTomato-LTI6b* in the forming  
32 cell plate to the egg cell elongation took  $4.7 \pm 0.6$  hrs  
33 (Figure 2A,B). Considering that the mRuby2 and EGFP  
34 required 150 min and 25 min to mature, respectively (Lam  
35 et al., 2012), the NLS may take a long time to localize to  
36 the nucleus after transcription. Furthermore, since the  
37 NLS line had a considerable variations in the time re-  
38 quired for the detection of the expression (Figure 3D),  
39 free-fluorescent proteins or other signal peptide-fusions  
40 were preferred to determine the timing required for the  
41 transcription. Although the nuclei were always located  
42 at the micropylar end of the synergid cells in the wild  
43 type (Figure 4A), it moved around in the synergid cells  
44 of the *myb98* (Figure 4B). The nuclei tracking over 14 hr  
45 also showed that the nuclei of the *myb98* moved closer to  
46 the chalazal end than to the wild type (Figure 4C). The  
47 large vacuoles occupied the chalazal end of the synergid  
48 cells in the wild type (Figure 4A). This polar distribution  
49 of the vacuole was disturbed in the synergid cells of the  
50 *myb98* (Figure 4B). In addition, the *myb98* synergid cells  
51 were more elongated during the maturation (Figure 4B;  
52 2:50—8:20). The results showed that the absence of the  
53 *MYB98* affected the morphology and cellular dynamics  
54 of the synergid cells in addition to the formation of the  
55 filiform apparatus (Kasahara et al., 2005).

### 3.5 Gene expression analysis of the female gametophyte cell

To investigate the gene expression profiles of the synergid cells in the wild type and *myb98* mutant, we established a method to isolate them in *Arabidopsis*. We treated the ovules in emasculated ovaries of the transgenic marker line for the synergid cells, *MYB98pro::GFP* (Figure 5B), with enzyme solutions. The protoplasts of the synergid cells were released from the ovules through their micropyles with enzyme treatment for 30–60 min (Figure S1A), and those with the GFP signals were collected by micromanipulation (Figure 5A). Initially, the synergid cell-derived protoplasts mostly associated with other GFP-negative ovular cells, probably due to insufficient cell wall digestion. To increase the efficiency of the single synergid cell isolation, we optimized the following two conditions. One was the calcium nitrate in the enzyme solution as the calcium ion was suggested to inhibit the degradation of the cell wall (Imre and Kristóf, 1999). Subsequently, the removal of calcium ion from the enzyme solution decreased the adhesion of protoplasts and increased the frequency of the collectable synergid cells that were released as single cells (Figure S1B, Table S1). The other condition was the pH of the enzyme solution. We found that the protoplasts began to decrease the GFP fluorescence in a short period and eventually ruptured after the cell surface that gradually became rough, and this may be related to the decreases in viability. We performed the enzyme treatments at pH values of 5.0–9.0 and observed the GFP fluorescence as a vital indicator of the protoplast (Chiu et al., 1996). The rate of the GFP-positive synergid protoplasts was highest at pH 7.0, which was the best for the isolation of the synergid cells (Figure S1C, Table S2). The optimized enzyme solutions allowed us to collect pure synergid cells with high efficiency (Figure 5C). To isolate other types of female gametophyte cells, we examined the enzyme solution treatment with the ovules of each marker line, *EC1.2pro::mtKaede* and *FWApro::FWA-GFP*, for the egg and central cells, respectively (Hamamura et al., 2011; Kinoshita et al., 2004). The protoplasts of the two gametic cells were also detached from their ovules through the micropyle (Figure 5E–H).

We then performed RNA-seq to analyze the gene expression profiles of the collected synergid, egg, and central cells in the wild type and the synergid cells in the *myb98* mutant (Figure 5D). RNA-seq data from these female gametophyte cells were mapped to the genome of *Arabidopsis* (TAIR version 10) with the published sequence data from the ovules at 12 hr-after-emasculatation (HAE) (Kasahara et al., 2016) and 2-week-old seedlings (Rogers et al., 2012). There were 4,996–18,432 genes (read counts > 10) detected in each sample (Figure 6A; Table S3). Hierarchical clustering showed that all samples were clustered into six independent groups (Figure 6B). The principal component analysis (PCA) indicated that the PC1 (34.2 %) and PC2 (14.8 %) were sufficient for separating these samples into the six groups (Figure 6C). These results suggested that our datasets had a high level

of reproducibility. The expression profile of the synergid cells in the mutant was more like that of the egg cells than the synergid cells in the wild type. We identified the differentially expressed genes (DEGs) among the central cell, the egg cell, and the synergid cells in the wild type and between the synergid cells in the wild type and *myb98* mutant (Table S3). Interestingly, several egg cell-specific genes were highly expressed in the mutant synergid. We examined the expression patterns of the DEGs in the synergid dataset among all samples (Figure 6D). The cluster of mutant synergids was closer to that of the egg cells than the synergid cells in the wild type. These results also indicated that the expression pattern of the *myb98* mutant synergid was partially changed to be egg cell-like.

### 3.6 Egg cell-specific markers were expressed in one of the synergid cells of *myb98*

To confirm the expression patterns of the egg cell-specific genes in the *myb98*, we analyzed the CDR1-LIKE aspartyl proteases, which are highly expressed in the egg cells (Table S4). CDR1 (CONSTITUTIVE DISEASE RESISTANCE 1) was previously found to be involved in the peptide signaling of disease resistance (Xia et al., 2004). The phylogenetic analysis showed that *Arabidopsis* contained two distinct groups of CDR1s: a CDR1-LIKE2 (At1g31450)/CDR1-LIKE1 group (At2g35615) and a CDR1 (At5g33340)/CDR1-LIKE3 (At1g64830) group ((Olivares et al., 2011); Figure 7A). The *CDR1-LIKE2pro::CDR1-LIKE2-mClover* (hereafter *CDR1L2-mClover*) and *CDR1-LIKE1pro::CDR1-LIKE1-mClover* were expressed only in the egg cells, while the *CDR1pro::CDR1-mClover* was expressed in the central and the antipodal cells (Figure 7B, Supplementary Movie 11). These localizations were consistent with the groupings of the CDR1s by the phylogenetic analysis. Although the fluorescent signals of *CDR1L2-mClover* were limited to the egg cell after cellularization in the wild type (Figure 7B, Supplementary Movie 12, Table 1; 100%,  $n = 6$ ), *myb98* mutant had supernumerary cells with CDR1L2-mClover signals at the micropylar end (Figure 7B,C, Supplementary Movie 12, Table 1; 100%,  $n = 9$ ). Initially, the CDR1L2-mClover signal was limited to a single cell at the egg cell position (Figure 7C; 0:00). However, 9.5 hr after the signal detection in the egg cell, the *CDR1L2-mClover* signal was also detected in one of the synergid cells (Figure 7C; 9:30). In most cases, one of the synergid cells had the expression of *CDR1L2-mClover* in the *myb98* (Table 2; 89%,  $n = 9$ ).

Previously, the *myb98* mutant synergid cells were found to have high expression levels for the egg cell-specific gene, *SBT4.13* (Bleckmann and Dresselhaus, 2016). The fluorescent signal of *SBT4.13pro::SBT4.13-mClover* was detected only in the egg cell before the egg cell elongation (Figure 8A; 0:00–1:30, Supplementary Movie 13). This expression timing of the *SBT4.13pro::SBT4.13-mClover* was similar to that of *EC1.2pro::mtKaede* (Figure 3A). The *myb98* ovules showed two patterns of

## DYNAMICS OF THE CELL FATE SPECIFICATIONS DURING FEMALE GAMETOPHYTE DEVELOPMENT IN *Arabidopsis*

1 *SBT4.13pro::SBT4.13-mClover* in the female gametophyte  
2 (Figure 8B, Supplementary Movie 14). One is the ex-  
3 pression of *SBT4.13pro::SBT4.13-mClover* in the syn-  
4 ergid and the antipodal cells in addition to the egg cells  
5 of the *myb98* ovules (Figure 8B; upper, Supplementary  
6 Movie 14; former, Table 1; 30%). The other is the syn-  
7 ergid and the egg cell (Figure 8B; lower, Supplementary  
8 Movie 14, later, Table 1; 65%). Similar to the results for  
9 the *CDR1L2-mClover*, one of the synergid cells showed  
10 *SBT4.13pro::SBT4.13-mClover* expression in the *myb98*  
11 (Table 2; 74%).

12 To determine whether the egg cell-specific markers were  
13 expressed in the one or two synergid cells more clearly,  
14 we observed the *myb98* ovules in the multiple cell-type-  
15 specific marker line (Figure 8C, Supplementary Movie 15).  
16 After detection of the *MYB98pro::mRuby3-LTI6b* signal in  
17 the two synergid cells (Figure 8C; 0:00), the signal of the  
18 *EC1.1pro::SP-mTurquoise2-CTPP* was detected in one of  
19 the synergid cells (Figure 8C; 0:00; lower). Thus, one of  
20 the synergid cells showed that cell fate conversion to the  
21 egg cell in the *myb98*.

## 22 4 DISCUSSION

23 We established a live-female gametophyte imaging system  
24 to visualize the nuclear divisions and cell fate specifica-  
25 tions in *Arabidopsis thaliana*. This system revealed the  
26 living-dynamics of the female gametophyte development,  
27 such as nuclear movements, cell elongation, duration of  
28 each FG stage, and the expression time of each cell-specific  
29 gene (Figure 9). Previously, we had developed the N5T  
30 medium for *in vitro* ovule cultures to perform live-cell  
31 analysis of the embryo development in *Arabidopsis* (Gooh  
32 et al., 2015). The Nitsch medium supplemented with 5%  
33 trehalose, resulted in the highest percentage of ovule sur-  
34 vival *in vitro* during seed development after fertilization.  
35 This medium also enabled us to perform live-cell imaging  
36 during female gametophyte development, prior to fertiliza-  
37 tion. There are different technical advantages and limita-  
38 tions of the live-cell imaging of the female gametophyte  
39 development within the ovules in *Arabidopsis*.

40 One advantage is the observation distance of the female  
41 gametophyte within the ovule. In the case of the embryo  
42 development, the ovule expansion during the seed develop-  
43 ment makes it difficult to observe the subcellular structures  
44 of the embryo within the ovule by confocal microscopy.  
45 Therefore, two-photon microscopy helps us to perform  
46 deep imaging of the zygote and embryo within the ovules.  
47 (Gooh et al., 2015; Kimata et al., 2016, 2019). The ovule  
48 elongated only along the micropylar-chalazal axis via the  
49 growth of the female gametophyte and the integument (Fig-  
50 ure 2A,D). Therefore, it was possible to conduct live-cell  
51 imaging of the female gametophytes development with  
52 high resolution using confocal microscopy.

53 One limitation was the difficulties with the expansion  
54 of the female gametophytes during early development, as  
55 during *in vitro* ovule cultures, the female gametophytes

collapsed in some cases. A possible cause was the change  
of turgor pressures in the female gametophytes. Optimal  
osmotic conditions for the isolation of the female gameto-  
phytic cells in *Torenia fournieri*, showed that the osmotic  
pressures increased from FG0 to FG4 and decreased from  
FG4 to FG6, at their peaks (Imre and Kristóf, 1999). The  
*T. fournieri* was slightly different from *Arabidopsis*, as  
the female gametophyte was naked from FG4, but it was  
inferred that the osmotic pressure was different during  
the female gametophyte development, even in the *Ara-  
bidopsis*. Especially in the early stages (FG0), the female  
gametophytes were not enclosed by the integuments. As  
a result, the *in vitro* developments of the integuments did  
not proceed, and the development of the female gameto-  
phytes was stopped. When the integuments covered the  
female gametophytes in the late FG0, the female game-  
tophyte development proceeded *in vitro* (Figure 1B). To  
observe meiosis, megasporogenesis, and other early pro-  
cesses *in vitro* in real-time, it was considered that further  
improvements were required, such as the determination  
of conditions in which a placenta was attached without  
isolation.

### 4.1 Subcellular dynamics in female gametophyte development

To date, the female gametophyte of *Arabidopsis* has been  
analyzed only in fixed samples, so the actual developmen-  
tal time course and subcellular dynamics were not known  
(Christensen et al., 1997). One of the major events that  
could not be seen in the fixed samples was that the vacu-  
oles were dynamic in the female gametophytes. In the  
previous schematics, the vacuoles were drawn as large  
and only in the center of the cell (Drews and Koltunow,  
2011). When the polar nuclei migrated to fuse to each  
other at FG5, they were described as moving along the  
periphery of the female gametophyte to avoid the large  
vacuole. (Sprunck and Groß-Hardt, 2011). However, the  
observations of the present study showed that the polar  
nuclei migrated linearly to fuse and adhere to the vacuole  
in the middle of the cell at shorter distances (Figure 1).  
This result suggests that the vacuoles of the female ga-  
metophyte did not remain large and static, but changed  
shape dynamically. The dynamics of the vacuoles have  
been seen in *Arabidopsis* and tobacco BY-2 cultured cells,  
and this plasticity is due to actin filaments (Higaki et al.,  
2006; Segami et al., 2014). As actin filaments were also  
involved in the nuclear migrations during gamete fusion,  
the linear migration of the polar nuclei was expected to  
involve actin filaments (Kawashima et al., 2014). In the  
mature central cells after polar nuclei fusions, the nucleus  
of the central cells were located to the micropylar end,  
and the actin filaments played an important role in the posi-  
tioning of the nucleus (Kawashima and Berger, 2015). The  
vacuoles were located at the chalazal end of the synergid  
cells and the micropylar end of the egg cells, thus appear-  
ing to limit the nuclear migration (Figs.3A, 4A). In the  
case of *myb98* mutant, the vacuoles were dynamic, causing  
the nuclei to move around and not to stay in one place



1 (Figure 4B,C). It is considered that this nuclear movement  
2 promoted the expression of the egg cell markers in the  
3 synergid cells of *myb98*. Alternatively, this movement may  
4 appear as a mixture of the egg and synergid cells identity  
5 (Figure 6C). Strong correlations between the nuclear position  
6 and the cell fate were shown in several mutants (Kong  
7 et al., 2015; Groß-Hardt et al., 2007; Pagnussat et al., 2007;  
8 Moll et al., 2008; Kirioukhova et al., 2011). However, it  
9 remains unclear whether the nuclear position determines  
10 gene expression or gene expression determines the nuclear  
11 positioning. Manipulation of nuclear behavior with the *in*  
12 *vitro* ovule culture systems will help to reveal the mechanisms  
13 of cell fate specifications in the development of the  
14 female gametophytes.

#### 15 4.2 The synergid cells of *myb98* showed egg-cell like 16 gene expressions

17 Previous studies have supported the lateral inhibition  
18 model for the differentiation of the female gametophyte  
19 cells. Although all cells in the female gametophyte have  
20 the gametic cell competence, the accessory cells like the  
21 synergid and antipodal cells, are repressed in the gametic  
22 cell fate (Groß-Hardt et al., 2007; Tekleyohans et al., 2017).  
23 In the present study, the RNA-seq of the female gametophyte  
24 cells identified many of the DEGs and the highly expressed  
25 genes in each type of cell (Table S3). We compared the DEGs  
26 between wild type and *myb98* identified by this RNA-seq  
27 study with those identified by the microarrays (Jones-Rhoades  
28 et al., 2007). The number of upregulated genes in the  
29 *myb98* was 204 and 40 from the RNA-seq and microarray,  
30 respectively (Figure S1D). The number of downregulated genes  
31 in the *myb98* was 188 and 77 from the RNA-seq and  
32 microarray, respectively (Figure S1E). These results suggested  
33 that cell-specific RNA-seq had much higher sensitivity for  
34 the detection of the DEGs than the microarrays, because of  
35 the number of DEGs. Although 70 downregulated genes in  
36 *myb98* were overlapped between RNA-seq and microarray  
37 data, only 4 upregulated genes in *myb98* were overlapped  
38 (Figure S1D,E). The differences in the upregulated genes  
39 of the *myb98* may be caused by the wild type background  
40 and the developmental stage for the sampling (Jones-Rhoades  
41 et al., 2007). Furthermore, our RNA-seq revealed that the  
42 gene expression profiles of the *myb98* mutant synergid,  
43 changed partially to the egg cell-like (Table S4). A previous  
44 microarray analysis of *myb98* presented different results,  
45 however, this is thought to be because their sample contained  
46 the entire ovule, not the synergid cells alone (Jones-Rhoades  
47 et al., 2007). The RNA-seq conducted here allowed for the  
48 isolation of single cell types and mutants, and thus enabled  
49 the detection of cell-specific changes. This has evidenced the  
50 power of this method for investigation of cell fate specification  
51 mechanisms.

52  
53 The *MYB98* was reported as the gene that controlled the  
54 characteristic development of the synergid cells (Kasahara  
55 et al., 2005). The *myb98* synergid was like a deficient  
56 egg cell, because an important factor for the synergid cell

fate was lost. The hierarchical clustering and the difference  
of gene expressions reflect the intermediary state of the  
*myb98* synergid (Figure 6B,C,D). Further research is  
required to identify if the synergid cells of the *myb98* function  
as egg cells, synergid cells, or both.

#### 6 4.3 The complex regulation is necessary for the egg 7 cell specification and function

8 As the fluorescence of the *EC1.2pro::mtKaede* was detected  
9 before the egg cell elongation, it was considered that the  
10 expression of the *EC1.2* began immediately after cellularization.  
11 *CDRIL2-mClover* and *ABI4pro::H2B-tTomato* were expressed at  
12 the stage of egg cell maturation, whereas the *EC1.2pro::mtKaede*,  
13 *EC1.1pro::NLS-3xDsRed2*, and *SBT4.13pro::SBT4.13-mClover* began  
14 to be expressed immediately after cellularization, and before  
15 egg cell elongation. The fact that egg cell-specific genes  
16 were expressed at different times provides clues as to their  
17 function and the regulation of their expression. The synergid  
18 cells of the *myb98* mutant also showed these differences in  
19 the timing of the expression in the egg cells. In the *myb98*,  
20 *SBT4.13pro::SBT4.13-mClover* was expressed almost  
21 simultaneously in the egg cells, and the synergid cells during  
22 the cell elongation. On the other hand, *CDRIL2-mClover* was  
23 expressed in the synergid cells after egg cell maturation.  
24 The expression of *SBT4.13pro::SBT4.13-mClover* in the  
25 synergid cells from the early stage indicated that the *myb98*  
26 synergid cells had changed their cell fate from the early stage.  
27 These results suggested that what each gene senses and  
28 recognizes as an egg cell is different. The *myb98* pistils had  
29 only one embryo after fertilization (10 pistils; 63 ovules).  
30 This result indicated that the synergid cells with the egg  
31 cell-specific genes were not functional for fertilization in  
32 the *myb98*. The additional egg-like cells appear to not be  
33 functional in the *lis*, *clo*, *ato* and *wyr* (Groß-Hardt et al.,  
34 2007; Moll et al., 2008; Kirioukhova et al., 2011). However,  
35 the *amp1* has twin embryos and *eostre* has twin zygote-like  
36 cells, indicating that these additional egg-like cells are  
37 functional for fertilization (Pagnussat et al., 2007; Kong  
38 et al., 2015). These differences in the gene expressions of  
39 the mutants may provide clues as to the acquisitions of the  
40 egg cell functions.

#### 43 4.4 The maintenance, not initiation, of synergid 44 specific genes were defective in *myb98*

45 Previously, it has been reported that *MYB98pro::GFP* is  
46 expressed in all cells of the female gametophyte, except for  
47 the antipodal cells at FG5 (Ingouff et al., 2006). However,  
48 the *MYB98pro::GFP* signals were detected before the third  
49 mitosis, i.e., before cellularization (Figure 3B). Therefore,  
50 it is considered that the expression was observed in all cells  
51 of the female gametophyte, not only in the synergid cells  
52 at FG5. In the *MYB98pro::NLS-mRuby2*, the fluorescent  
53 signals of the NLS-mRuby2 were also detected in all of  
54 the female gametophyte cells at FG5 (Figure 4A). Except  
55 for the synergid cells, the fluorescent signals of the GFP  
56

1 and NLS-mRuby2 were decreased as the cells matured  
2 (Figure 3B, 4A). These results suggested that the synergid  
3 cell fate stabilized the gene expression of the *MYB98*. This  
4 stabilization was independent of the *MYB98*. The ectopic  
5 expressions of the *MYB98pro::GFP* and *MYB98pro::NLS-*  
6 *mRuby2* were not detected after the restrictions of the ex-  
7 pression to the synergid cells in the *myb98* mutant (Figure  
8 4B). This suggested that the egg and central cells regularly  
9 maintain their cell fates, and the initiation of the synergid  
10 cell fate was normal in the *myb98*. Considering these re-  
11 sults, the positional information of nuclei is essential for  
12 the initiation of the synergid cell fate. Recently, Zhang  
13 et al. (2020) reported that *AGL80* directly represses the  
14 *MYB98* expression in the central cell. The specific genes  
15 for the accessory cells are expressed in the central cell  
16 of *agl61* mutant and *agl80* mutant (Steffen et al., 2008;  
17 Zhang et al., 2020). In the egg cell and antipodal cells, the  
18 *MYB98* expression may also be suppressed by unknown  
19 factors. The signal of *SBT4.13pro::SBT4.13-mClover* was  
20 also detected in the synergid cell and the antipodal cells  
21 of the *myb98* mutant (Figure 8B). This ectopic expression  
22 coincided with the *SBT4.13pro::SBT4.13-mClover* expres-  
23 sion in the egg cell. These findings suggested that the  
24 *MYB98* may also play a role in preventing the acquisition  
25 of the egg cell fate in the accessory cells.

#### 26 4.5 Cell-cell communication between the two 27 synergid cells

28 An interesting phenotype of the *myb98* mutant was that  
29 one of the two synergid cells tends to be converted to an  
30 egg cell fate (Table 2; 89% for *CDRIL2-mClover*, 74%  
31 for *SBT4.13pro::SBT4.13-mClover*). Some mutants show  
32 similar phenotypes with additional egg cells (Groß-Hardt  
33 et al., 2007; Moll et al., 2008; Pagnussat et al., 2007; Kiri-  
34 oukhova et al., 2011; Kong et al., 2015). In the *amp1* mu-  
35 tant, 19% of the ovules showed *EC1.1pro::HTA6-3GFP*  
36 expression in both synergid cells, whereas 26% of the  
37 ovules showed their expression in only one of the synergid  
38 cells (notably, 45% of the ovules have no detectable fluo-  
39 rescent signal) (Kong et al., 2015). The synergid cells play  
40 an important role in the pollen tube attraction, by secret-  
41 ing peptides (Mizuta and Higashiyama, 2018). Previously,  
42 we found that the laser disruption of the immature egg  
43 cells affects the cell differentiation for one of the synergid  
44 cells in the *Torenia fournieri* (Susaki et al., 2015). The  
45 results presented here suggest that not only is there cell-  
46 cell communication between the egg and synergid cells,  
47 but also that there is cell-cell communication between the  
48 two synergid cells. Based on these findings, we speculate  
49 that the synergid cells detect the abnormal conditions of  
50 the egg cell, inducing the decrease of *MYB98* expression.  
51 The combination of this monitoring system and the flexible  
52 fate maintenance might allow for only one of the two syn-  
53 ergid cells to become an egg cell. In the case of the ovule,  
54 which has been converted from both the synergid cells to  
55 the egg cell fate, it cannot attract pollen tubes. Therefore,  
56 it is expected that plants may have a mechanism, which  
57 is independent of the *MYB98*, to retain not only the egg

cell but also the synergid cell for pollen tube attraction and  
fertilization.

Our results suggested that the cell fate specification are  
immediately initiated around the time of cellularization,  
depending on the positional information of the nucleus.  
Moreover, the failure of the cell fate maintenance, like that  
of the *myb98* mutant, induced cell fate conversions from  
the adjacent accessory cells to the gametes for compensa-  
tion of the fertilization. Previously, the existence of the  
cell-cell communication between the gametic cells and  
accessory cells, such as lateral inhibition from the egg cell  
to the synergid cells, was proposed (Tekleyohans et al.,  
2017). We proposed that the synergid cells communicated  
with each other to determine their fate and behavior, and  
such flexibility compensates for the robustness of plant  
fertilization. Further studies, such as single-cell transcrip-  
tome profiling of the mutant synergids, will provide novel  
insights into the molecular mechanisms of the cell-cell  
communications in the cell fate specification of plants.

#### Conflict of Interest Statement

The authors declare that the research was conducted in the  
absence of any commercial or financial relationships that  
could be construed as a potential conflict of interest.

#### Author Contributions

D.S. and D.K. conceived the study; D.S. and D.K. designed  
the experiments; D.S. and T.H. carried out transcriptome  
analysis; T.S. performed RNA sequencing; D.S. and T.S.  
analyzed the sequencing data; D.S. and D.M. carried out  
*SBT4.13* expression analysis; M.U. carried out observation  
of *myb98* embryos; D.K. carried out live-imaging analysis;  
D.S. and D.K. analyzed the data; D.S., T.H. and D.K. su-  
pervised the project; D.S. and D.K. drafted the manuscript;  
and T.S., D.M., M.U. and T.H. edited the manuscript.

#### Funding

This work was supported by the Japan Society for the Pro-  
motion of Science [Grant-in-Aid for Scientific Research  
on Innovative Areas [JP19H04869 to D.M., JP17H05838,  
JP19H04859, JP19H05670, and JP19H05676 for M.U.,  
JP16H06464 and JP16H06465 for T.H.], [Grant-in-Aid  
for JSPS Fellows (JP10J07811 and JP18J01963 for D.S.),  
Grant-in-Aid for Young Scientists (JP19K16172 for D.S.)],  
Grant-in-Aid for Scientific Research (B, JP19H03243 for  
M.U., B, JP17H03697 for D.K.), Grant-in-Aid for Chal-  
lenging Exploratory Research (JP19K22421 for M.U.,  
JP18K19331 for D.K.)] and the Japan Science and Technol-  
ogy Agency [PRESTO program (JPMJPR18K4 for D.K.)].  
The microscopy was partly supported by Live Imaging  
Center at the Institute of Transformative Bio-Molecules  
(WPI-ITbM) of Nagoya University.

## 1 Acknowledgments

2 We thank R. Groß-Hardt, T. Kinoshita, and M. Fu-  
3 jimoto for the plant materials; S. Nasu, T. Nishii,  
4 T. Shinagawa, and Y. Taniuchi for assistance with  
5 cloning and the generation of transgenic plants; T. Na-  
6 gata, N. Kurata, J. Kawarama, H. Ohyanagi, A. Toy-  
7 oda, A. Fujiyama for support to examine the method  
8 of mRNA amplification; H. Nagata and K. Tonosaki  
9 for discussions regarding the data analysis; Editage  
10 (www.editage.com) for English language editing. Com-  
11 putations were partially performed on the NIG supercom-  
12 puter at ROIS National Institute of Genetics. This pre-print  
13 manuscript was written in L<sup>A</sup>T<sub>E</sub>X using a custom style pro-  
14 vided by Alex S. Baldwin (github.com/alexsaldwin/  
15 biorxiv-inspired-latex-style) with some modifi-  
16 cations.

## 17 Supplemental Data

18 The supplemental materials are available in the online  
19 version of this article.

## 20 Data Availability Statement

21 RNA-seq data associated with this study have been de-  
22 posited in DDBJ Sequence Read Archive (DRA) under  
23 the accession number, DRR220104–DRR220111. Public  
24 data of egg cell, ovule and seedling were DRR174980,  
25 DRR174981, DRR174982, DRR044370, DRR066525,  
26 SRR346552, SRR346553.

## 27 References

28 Adachi, S., Minamisawa, K., Okushima, Y., Inagaki, S.,  
29 Yoshiyama, K., Kondou, Y., Kaminuma, E., Kawashima,  
30 M., Toyoda, T., Matsui, M., Kurihara, D., Matsunaga,  
31 S., and Umeda, M. (2011). Programmed induction of  
32 endoreduplication by DNA double-strand breaks in Ara-  
33 bidopsis. *Proc Natl Acad Sci U S A*, 108(24):10004–  
34 10009.

35 An, L. H. and You, R. L. (2004). Studies on nuclear  
36 degeneration during programmed cell death of synergid  
37 and antipodal cells in *Triticum aestivum*. *Sex Plant*  
38 *Reprod.*

39 Anderson, S. N., Johnson, C. S., Jones, D. S., Conrad,  
40 L. J., Gou, X., Russell, S. D., and Sundaresan, V. (2013).  
41 Transcriptomes of isolated *Oryza sativa* gametes char-  
42 acterized by deep sequencing: Evidence for distinct  
43 sex-dependent chromatin and epigenetic states before  
44 fertilization. *Plant J.*

45 Bleckmann, A. and Dresselhaus, T. (2016). Fluorescent  
46 whole-mount RNA in situ hybridization (F-WISH) in  
47 plant germ cells and the fertilized ovule. *Methods.*

Boisnard-Lorig, C., Colon-Carmona, A., Bauch, M.,  
1 Hodge, S., Doerner, P., Bancharel, E., Dumas, C.,  
2 Haseloff, J., and Berger, F. (2001). Dynamic analy-  
3 ses of the expression of the histone::YFP fusion protein  
4 in *Arabidopsis* show that syncytial endosperm is divided  
5 in mitotic domains. *Plant Cell.*  
6

Brukhin, V., Curtis, M. D., and Grossniklaus, U. (2005).  
7 The angiosperm female gametophyte: No longer the  
8 forgotten generation. *Curr Sci.*  
9

Chen, S., Zhou, Y., Chen, Y., and Gu, J. (2018). Fastp: An  
10 ultra-fast all-in-one FASTQ preprocessor. *Bioinformat-*  
11 *ics*, 34(17):i884–i890.  
12

Chiu, W. L., Niwa, Y., Zeng, W., Hirano, T., Kobayashi,  
13 H., and Sheen, J. (1996). Engineered GFP as a vital  
14 reporter in plants. *Curr Biol.*  
15

Christensen, C. A., King, E. J., Jordan, J. R., and Drews,  
16 G. N. (1997). Megagametogenesis in *Arabidopsis* wild  
17 type and the Gf mutant. *Sex Plant Reprod.*  
18

Diboll, A. G. and Larson, D. A. (1966). An electron  
19 microscopic study of the mature megagametophyte in  
20 *Zea mays*. *Am J Bot.*  
21

Drews, G. N. and Koltunow, A. M. (2011). The Female  
22 Gametophyte. *Arab. B.*  
23

Gooh, K., Ueda, M., Aruga, K., Park, J., Arata, H., Hi-  
24 gashiyama, T., and Kurihara, D. (2015). Live-Cell Imag-  
25 ing and Optical Manipulation of *Arabidopsis* Early Em-  
26 bryogenesis. *Dev Cell*, 34(2):242–251.  
27

Groß-Hardt, R., Kägi, C., Baumann, N., Moore, J. M.,  
28 Baskar, R., Gagliano, W. B., Jürgens, G., and Gross-  
29 niklaus, U. (2007). LACHESIS restricts gametic cell  
30 fate in the female gametophyte of *Arabidopsis*. *PLoS*  
31 *Biol.*  
32

Hajdukiewicz, P., Svab, Z., and Maliga, P. (1994). The  
33 small, versatile pPZP family of *Agrobacterium* bi-  
34 nary vectors for plant transformation. *Plant Mol Biol*,  
35 25(6):989–994.  
36

Hamamura, Y., Saito, C., Awai, C., Kurihara, D.,  
37 Miyawaki, A., Nakagawa, T., Kanaoka, M. M., Sasaki,  
38 N., Nakano, A., Berger, F., and Higashiyama, T. (2011).  
39 Live-cell imaging reveals the dynamics of two sperm  
40 cells during double fertilization in *Arabidopsis thaliana*.  
41 *Curr Biol*, 21(6):497–502.  
42

Heydlauff, J. and Groß-Hardt, R. (2014). Love is a battle-  
43 field: Programmed cell death during fertilization. *J Exp*  
44 *Bot.*  
45

Higaki, T., Kutsuna, N., Okubo, E., Sano, T., and  
46 Hasezawa, S. (2006). Actin microfilaments regulate  
47 vacuolar structures and dynamics: Dual observation of  
48 actin microfilaments and vacuolar membrane in living  
49 tobacco BY-2 cells. *Plant Cell Physiol.*  
50

DYNAMICS OF THE CELL FATE SPECIFICATIONS DURING FEMALE GAMETOPHYTE DEVELOPMENT IN *Arabidopsis*

- 1 Higashiyama, T. (2002). The synergid cell: Attractor and  
2 acceptor of the pollen tube for double fertilization. *J*  
3 *Plant Res.*
- 4 Holloway, S. J. and Friedman, W. E. (2008). Embryologi-  
5 cal features of *Tofieldia glutinosa* and their bearing on  
6 the early diversification of monocotyledonous plants.  
7 *Ann Bot.*
- 8 Huang, B.-Q. and Russell, S. D. (1989). Isolation of Fixed  
9 and Viable Eggs, Central Cells, and Embryo Sacs from  
10 Ovules of *Plumbago zeylanica*. *Plant Physiol*, 90(1):9–  
11 12.
- 12 Huang, B. Q. and Russell, S. D. (1992). Female Germ  
13 Unit: Organization, Isolation, and Function. *Int Rev*  
14 *Cytol.*
- 15 Ikeda, Y., Kinoshita, Y., Susaki, D., Ikeda, Y., Iwano, M.,  
16 Takayama, S., Higashiyama, T., Kakutani, T., and Ki-  
17 noshita, T. (2011). HMG Domain containing SSRP1 is  
18 required for DNA demethylation and genomic imprint-  
19 ing in *Arabidopsis*. *Dev Cell*, 21(3):589–596.
- 20 Imre, K. and Kristóf, Z. (1999). Isolation and osmotic  
21 relations of developing megagametophytes of *Torenia*  
22 *fournieri*. *Sex Plant Reprod.*
- 23 Ingouff, M., Jullien, P. E., and Berger, F. (2006). The  
24 female gametophyte and the endosperm control cell  
25 proliferation and differentiation of the seed coat in *Ara-*  
26 *bidopsis*. *Plant Cell*.
- 27 Jones-Rhoades, M. W., Borevitz, J. O., and Preuss, D.  
28 (2007). Genome-wide expression profiling of the *Ara-*  
29 *bidopsis* female gametophyte identifies families of small,  
30 secreted proteins. *PLoS Genet.*
- 31 Kasahara, R. D., Notaguchi, M., Nagahara, S., Suzuki,  
32 T., Susaki, D., Honma, Y., Maruyama, D., and Hi-  
33 gashiyama, T. (2016). Pollen tube contents initiate ovule  
34 enlargement and enhance seed coat development with-  
35 out fertilization. *Sci Adv*, 2(10):e1600554.
- 36 Kasahara, R. D., Portereiko, M. F., Sandaklie-Nikolova,  
37 L., Rabiger, D. S., and Drews, G. N. (2005). MYB98  
38 is required for pollen tube guidance and synergid cell  
39 differentiation in *Arabidopsis*. *Plant Cell*.
- 40 Kawano, N., Susaki, D., Sasaki, N., Higashiyama, T., and  
41 Kanaoka, M. M. (2011). Isolation of Gametophytic  
42 Cells and Identification of Their Cell-Specific Markers  
43 in *Torenia fournieri*, *T. concolor* and *Lindernia micran-*  
44 *tha*. *Cytologia*.
- 45 Kawashima, T. and Berger, F. (2015). The central cell  
46 nuclear position at the micropylar end is maintained by  
47 the balance of F-actin dynamics, but dispensable for  
48 karyogamy in *Arabidopsis*. *Plant Reprod.*
- 49 Kawashima, T., Maruyama, D., Shagirov, M., Li, J., Hama-  
50 mura, Y., Yelagandula, R., Toyama, Y., and Berger, F.  
51 (2014). Dynamic F-actin movement is essential for fer-  
52 tilization in *Arabidopsis thaliana*. *Elife*.
- Kim, D., Paggi, J. M., Park, C., Bennett, C., and Salzberg,  
S. L. (2019). Graph-based genome alignment and geno-  
typing with HISAT2 and HISAT-genotype. *Nat Biotech-*  
*nol.*
- Kimata, Y., Higaki, T., Kawashima, T., Kurihara, D., Sato,  
Y., Yamada, T., Hasezawa, S., Berger, F., Higashiyama,  
T., and Ueda, M. (2016). Cytoskeleton dynamics control  
the first asymmetric cell division in *Arabidopsis* zygote.  
*Proc Natl Acad Sci U S A*, 113(49):14157–14162.
- Kimata, Y., Kato, T., Higaki, T., Kurihara, D., Yamada, T.,  
Segami, S., Morita, M. T., Maeshima, M., Hasezawa,  
S., Higashiyama, T., Tasaka, M., and Ueda, M. (2019).  
Polar vacuolar distribution is essential for accurate asym-  
metric division of *Arabidopsis* zygotes. *Proc Natl Acad*  
*Sci U S A*.
- Kinoshita, T., Miura, A., Choi, Y., Kinoshita, Y., Cao,  
X., Jacobsen, S. E., Fischer, R. L., and Kakutani, T.  
(2004). One-Way Control of FWA Imprinting in *Ara-*  
*bidopsis* Endosperm by DNA Methylation. *Science (80-*  
*),* 303(5657):521–523.
- Kirioukhova, O., Johnston, A. J., Kleen, D., Kägi, C.,  
Baskar, R., Moore, J. M., Bäumlein, H., Groß-Hardt, R.,  
and Grossniklaus, U. (2011). Female gametophytic cell  
specification and seed development require the function  
of the putative *Arabidopsis* INCENP ortholog WYRD.  
*Development*.
- Kong, J., Lau, S., and Jürgens, G. (2015). Twin plants from  
supernumerary egg cells in *Arabidopsis*. *Curr Biol*.
- Kranz, E., Bautor, J., and Lörz, H. (1991). In vitro fertil-  
ization of single, isolated gametes of maize mediated by  
electrofusion. *Sex Plant Reprod.*
- Lam, A. J., St-Pierre, F., Gong, Y., Marshall, J. D., Cranfill,  
P. J., Baird, M. A., McKeown, M. R., Wiedenmann, J.,  
Davidson, M. W., Schnitzer, M. J., Tsien, R. Y., and Lin,  
M. Z. (2012). Improving FRET dynamic range with  
bright green and red fluorescent proteins. *Nat Methods*.
- Maeda, E. and Miyake, H. (1997). Ultrastructure of an-  
tipodal cells of rice (*Oryza sativa*) before anthesis with  
special reference to concentric configuration of endo-  
plasmic reticula. *Jpn J Crop Sci.*
- Maheshwari, P. (1950). *An introduction to the embryol-*  
*ogy of angiosperms*. McGraw-Hill, New York, 1st ed.  
edition.
- Márton, M. L., Cordts, S., Broadhvest, J., and Dresselhaus,  
T. (2005). Micropylar pollen tube guidance by egg  
apparatus 1 of maize. *Science (80- )*.
- Márton, M. L., Fastner, A., Uebler, S., and Dresselhaus,  
T. (2012). Overcoming hybridization barriers by the  
secretion of the maize pollen tube attractant ZmEA1  
from *Arabidopsis* ovules. *Curr Biol*.

DYNAMICS OF THE CELL FATE SPECIFICATIONS DURING FEMALE GAMETOPHYTE DEVELOPMENT IN *Arabidopsis*

- 1 Maruyama, D., Völz, R., Takeuchi, H., Mori, T., Igawa, T.,  
2 Kurihara, D., Kawashima, T., Ueda, M., Ito, M., Umeda,  
3 M., Nishikawa, S. I., Groß-Hardt, R., and Higashiyama,  
4 T. (2015). Rapid elimination of the persistent synergid  
5 through a cell fusion mechanism. *Cell*, 161(4):907–918.
- 6 Mizuta, Y. and Higashiyama, T. (2018). Chemical signal-  
7 ing for pollen tube guidance at a glance. *J Cell Sci*.
- 8 Mizuta, Y., Kurihara, D., and Higashiyama, T. (2015).  
9 Two-photon imaging with longer wavelength excitation  
10 in intact Arabidopsis tissues. *Protoplasma*, 252(5):1231–  
11 1240.
- 12 Mól, R. (1986). Isolation of protoplasts from female game-  
13 topytes of *Torenia fournieri*. *Plant Cell Rep*, 5(3):202–  
14 206.
- 15 Moll, C., Von Lyncker, L., Zimmermann, S., Kägi, C., Bau-  
16 mann, N., Twell, D., Grossniklaus, U., and Groß-Hardt,  
17 R. (2008). CLO/GFA1 and ATO are novel regulators of  
18 gametic cell fate in plants. *Plant J*.
- 19 Narusaka, M., Shiraishi, T., Iwabuchi, M., and Narusaka,  
20 Y. (2010). The floral inoculating protocol: A simplified  
21 Arabidopsis thaliana transformation method modified  
22 from floral dipping. *Plant Biotechnol*, 27(4):349–351.
- 23 Ohnishi, T., Takanashi, H., Mogi, M., Takahashi, H.,  
24 Kikuchi, S., Yano, K., Okamoto, T., Fujita, M., Kurata,  
25 N., and Tsutsumi, N. (2011). Distinct gene expression  
26 profiles in egg and synergid cells of rice as revealed by  
27 cell type-specific microarrays. *Plant Physiol*.
- 28 Okuda, S., Tsutsui, H., Shiina, K., Sprunck, S., Takeuchi,  
29 H., Yui, R., Kasahara, R. D., Hamamura, Y., Mizukami,  
30 A., Susaki, D., Kawano, N., Sakakibara, T., Namiki,  
31 S., Itoh, K., Otsuka, K., Matsuzaki, M., Nozaki, H.,  
32 Kuroiwa, T., Nakano, A., Kanaoka, M. M., Dresselhaus,  
33 T., Sasaki, N., and Higashiyama, T. (2009). Defensin-  
34 like polypeptide LUREs are pollen tube attractants se-  
35 creted from synergid cells. *Nature*.
- 36 Olivares, J. E., Díaz-Camino, C., Estrada-Navarrete, G.,  
37 Alvarado-Affantranger, X., Rodríguez-Kessler, M., Za-  
38 mudio, F. Z., Olamendi-Portugal, T., Márquez, Y.,  
39 Servín, L. E., and Sánchez, F. (2011). Nodulin 41,  
40 a novel late nodulin of common bean with peptidase  
41 activity. *BMC Plant Biol*, 11(October).
- 42 Osabe, T., Shimizu, K., and Kadota, K. (2019). Accu-  
43 rate classification of differential expression patterns in a  
44 bayesian framework with robust normalization for multi-  
45 group RNA-seq count data. *Bioinform Biol Insights*.
- 46 Pagnussat, G. C., Yu, H. J., and Sundaresan, V. (2007).  
47 Cell-fate switch of synergid to egg cell in Arabidopsis  
48 eostre mutant embryo sacs arises from misexpression of  
49 the BEL1-like homeodomain gene BLH1. *Plant Cell*.
- 50 Perteau, M., Kim, D., Perteau, G. M., Leek, J. T., and  
51 Salzberg, S. L. (2016). Transcript-level expression anal-  
52 ysis of RNA-seq experiments with HISAT, StringTie  
53 and Ballgown. *Nat Protoc*.
- Perteau, M., Perteau, G. M., Antonescu, C. M., Chang, T. C.,  
Mendell, J. T., and Salzberg, S. L. (2015). StringTie  
enables improved reconstruction of a transcriptome from  
RNA-seq reads. *Nat Biotechnol*.
- Rogers, M. F., Thomas, J., Reddy, A. S. N., and Ben-  
Hur, A. (2012). SpliceGrapher: Detecting patterns of  
alternative splicing from RNA-Seq data in the context  
of gene models and EST data. *Genome Biol*.
- Schindelin, J., Arganda-Carreras, I., Frise, E., Kaynig, V.,  
Longair, M., Pietzsch, T., Preibisch, S., Rueden, C.,  
Saalfeld, S., Schmid, B., Tinevez, J. Y., White, D. J.,  
Hartenstein, V., Eliceiri, K., Tomancak, P., and Cardona,  
A. (2012). Fiji: An open-source platform for biological-  
image analysis. *Nat Methods*, 9(7):676–682.
- Schmid, M. W., Schmidt, A., and Grossniklaus, U. (2015).  
The female gametophyte: An emerging model for cell  
type-specific systems biology in plant development.  
*Front Plant Sci*.
- Schmid, M. W., Schmidt, A., Klostermeier, U. C., Barann,  
M., Rosenstiel, P., and Grossniklaus, U. (2012). A  
powerful method for transcriptional profiling of specific  
cell types in eukaryotes: Laser-assisted microdissection  
and RNA sequencing. *PLoS One*, 7(1).
- Segami, S., Makino, S., Miyake, A., Asaoka, M., and  
Maeshima, M. (2014). Dynamics of vacuoles and H<sup>+</sup>-  
pyrophosphatase visualized by monomeric green fluo-  
rescent protein in Arabidopsis: Artfactual bulbs and  
native intravacuolar spherical structures. *Plant Cell*.
- Song, X., Yuan, L., and Sundaresan, V. (2014). Antipodal  
cells persist through fertilization in the female gameto-  
phyte of Arabidopsis. *Plant Reprod*.
- Sprunck, S., Baumann, U., Edwards, K., Langridge, P.,  
and Dresselhaus, T. (2005). The transcript composition  
of egg cells changes significantly following fertilization  
in wheat (*Triticum aestivum* L.). *Plant J*.
- Sprunck, S. and Groß-Hardt, R. (2011). Nuclear behav-  
ior, cell polarity, and cell specification in the female  
gametophyte. *Sex Plant Reprod*.
- Steffen, J. G., Kang, I. H., Macfarlane, J., and Drews,  
G. N. (2007). Identification of genes expressed in the  
Arabidopsis female gametophyte. *Plant J*.
- Steffen, J. G., Kang, I. H., Portereiko, M. F., Lloyd, A., and  
Drews, G. N. (2008). AGL61 interacts with AGL80 and  
is required for central cell development in Arabidopsis.  
*Plant Physiol*.
- Sun, J., Nishiyama, T., Shimizu, K., and Kadota, K. (2013).  
TCC: An R package for comparing tag count data with  
robust normalization strategies. *BMC Bioinformatics*.
- Susaki, D., Takeuchi, H., Tsutsui, H., Kurihara, D., and Hi-  
gashiyama, T. (2015). Live imaging and laser disruption

DYNAMICS OF THE CELL FATE SPECIFICATIONS DURING FEMALE GAMETOPHYTE DEVELOPMENT IN *Arabidopsis*

- 1 reveal the dynamics and cell-cell communication during  
2 torenia fournieri female gametophyte development.  
3 *Plant Cell Physiol*, 56(5):1031–1041.
- 4 Takeuchi, H. and Higashiyama, T. (2012). A Species-  
5 Specific Cluster of Defensin-Like Genes Encodes Dif-  
6 fusible Pollen Tube Attractants in Arabidopsis. *PLoS*  
7 *Biol*.
- 8 Takeuchi, H. and Higashiyama, T. (2016). Tip-localized  
9 receptors control pollen tube growth and LURE sensing  
10 in Arabidopsis. *Nature*, 531(7593):245–248.
- 11 Tekleyohans, D. G., Nakel, T., and Groß-Hardt, R. (2017).  
12 Patterning the female gametophyte of flowering plants.  
13 *Plant Physiol*.
- 14 Theunis, C. H., Pierson, E. S., and Cresti, M. (1991). Iso-  
15 lation of male and female gametes in higher plants. *Sex*  
16 *Plant Reprod*, 4(3):145–154.
- 17 Uchiumi, T., Komatsu, S., Koshiba, T., and Okamoto, T.  
18 (2006). Isolation of gametes and central cells from  
19 *Oryza sativa* L. *Sex Plant Reprod*.
- 20 Völz, R., Heydlauff, J., Ripper, D., VonLyncker, L., and  
21 Groß-Hardt, R. (2013). Ethylene Signaling Is Required  
22 for Synergid Degeneration and the Establishment of a  
23 Pollen Tube Block. *Dev Cell*.
- 24 Wuest, S. E., Schmid, M. W., and Grossniklaus, U. (2013).  
25 Cell-specific expression profiling of rare cell types as  
26 exemplified by its impact on our understanding of fe-  
27 male gametophyte development. *Curr Opin Plant Biol*,  
28 16(1):41–49.
- 29 Wuest, S. E., Vijverberg, K., Schmidt, A., Weiss, M., Ghey-  
30 selinck, J., Lohr, M., Wellmer, F., Rahnenführer, J., von  
31 Mering, C., and Grossniklaus, U. (2010). Arabidopsis  
32 Female Gametophyte Gene Expression Map Reveals  
33 Similarities between Plant and Animal Gametes. *Curr*  
34 *Biol*.
- 35 Xia, Y., Suzuki, H., Borevitz, J., Blount, J., Guo, Z., Patel,  
36 K., Dixon, R. A., and Lamb, C. (2004). An extracellu-  
37 lar aspartic protease functions in Arabidopsis disease  
38 resistance signaling. *EMBO J*.
- 39 Yadegari, R. and Drews, G. N. (2004). Female gameto-  
40 phyte development. *Plant Cell*.
- 41 Yang, X., Zhang, Q., Zhao, K., Luo, Q., Bao, S., Liu, H.,  
42 and Men, S. (2017). The arabidopsis GPR1 gene neg-  
43 atively affects pollen germination, pollen tube growth,  
44 and gametophyte senescence. *Int J Mol Sci*.
- 45 Yu, H. J., Hogan, P., and Sundaresan, V. (2005). Analysis  
46 of the female gametophyte transcriptome of Arabidopsis  
47 by comparative expression profiling. *Plant Physiol*.
- 48 Zhang, M.-X., Zhu, S.-S., Xu, Y.-C., Guo, Y.-L., Yang,  
49 W.-C., and Li, H.-J. (2020). Transcriptional repression  
50 specifies the central cell for double fertilization. *Proc*  
51 *Natl Acad Sci U S A*.
- Zhao, P., Zhou, X., Shen, K., Liu, Z., Cheng, T., Liu, D.,  
Cheng, Y., Peng, X., and xiang Sun, M. (2019). Two-  
Step Maternal-to-Zygotic Transition with Two-Phase  
Parental Genome Contributions. *Dev Cell*.

DYNAMICS OF THE CELL FATE SPECIFICATIONS DURING FEMALE GAMETOPHYTE DEVELOPMENT IN *Arabidopsis*

**Fig.1**

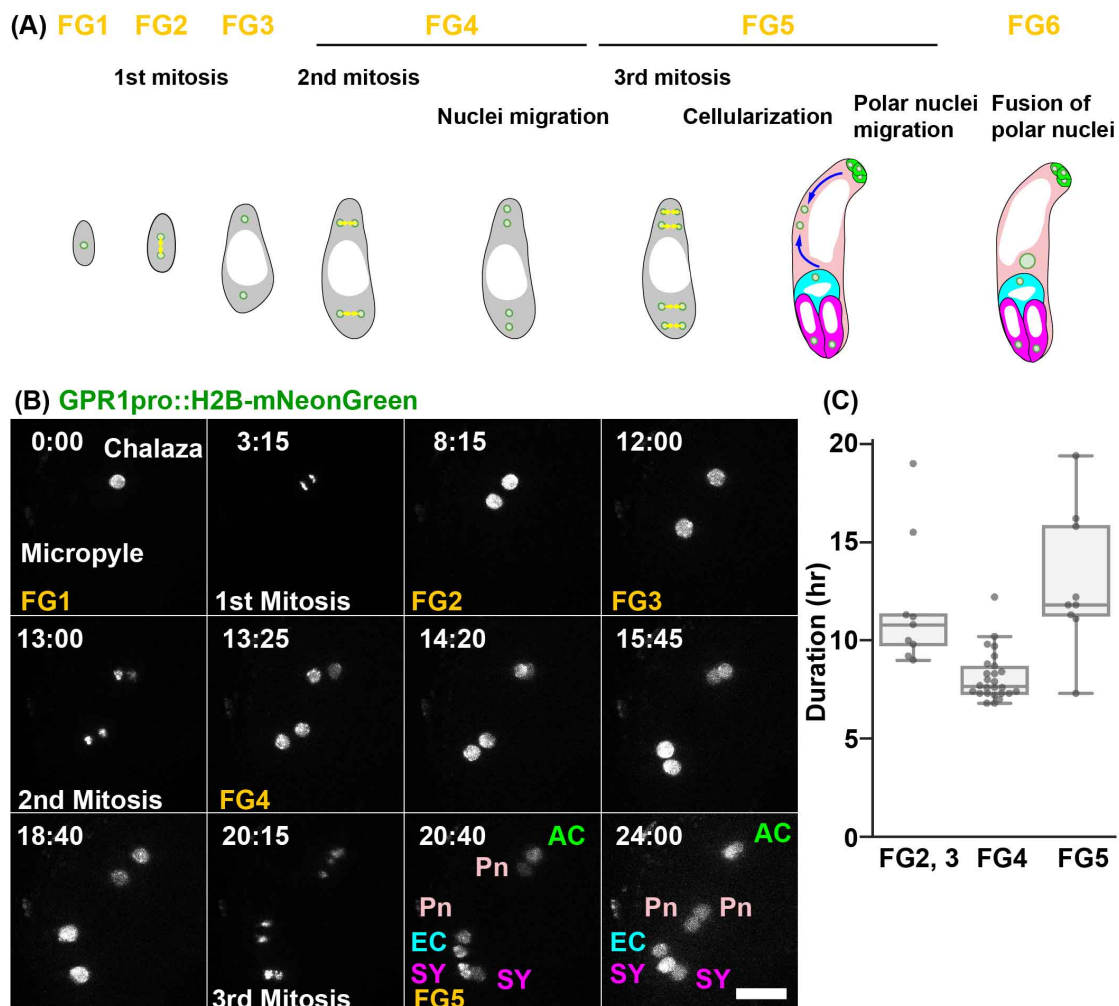

Figure 1: **(A)** Schematic representation of the development of a *Polygonum*-type female gametophyte. **(B)** Nuclei were labeled with *GPR1pro::H2B-mNeonGreen*. The numbers indicate time (hr:min) from the onset of the observation. We succeeded in time-lapse recordings of the nuclear divisions in the isolated ovules from the FG1 to FG6. FG1, uninucleate functional megaspore; FG2, two-nucleate stage; FG3, two nuclei separated by a large central vacuole; FG4, four-nucleate stage; FG5, eight-nucleate/seven-celled stage; FG6, seven-celled with polar nuclei fused. AC, antipodal cells; EC, egg cell; Pn, Polar nucleus; SY, synergid cell. Scale bar, 20  $\mu$ m. **(C)** Durations of the nuclear divisions between the stages from FG2 to FG6. The interval times of the nuclear divisions for the female gametophyte development were analyzed for *GPR1pro::H2B-mNeonGreen*, *RPS5Apro::H2B-tdTomato*, and *RPS5Apro::H2B-sGFP*.

DYNAMICS OF THE CELL FATE SPECIFICATIONS DURING FEMALE GAMETOPHYTE DEVELOPMENT IN *Arabidopsis*

**Fig.2**

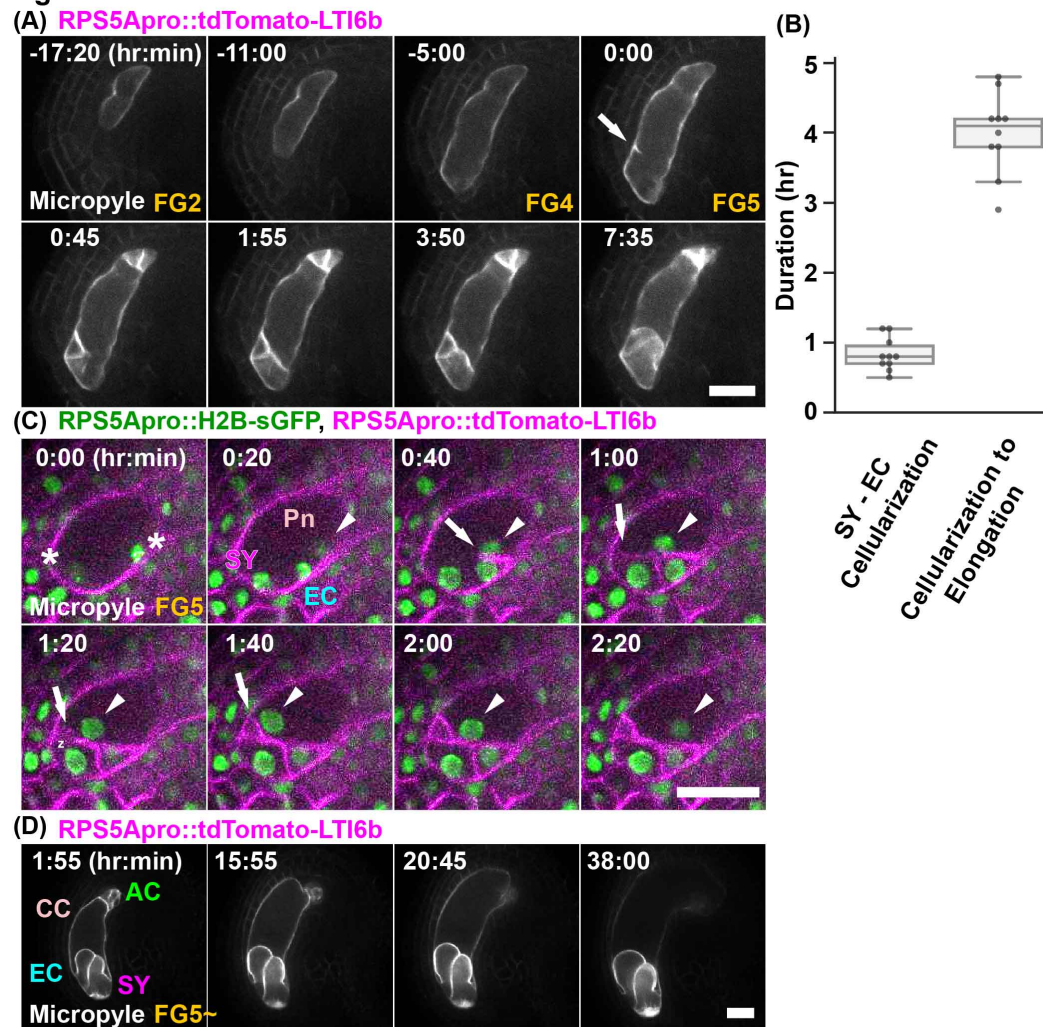

Figure 2: **(A)** Plasma membranes were labeled with *RPS5Apro::tdTomato-LTI6b*. Numbers indicate time (hr:min) from the detection of the fluorescent signal of the *tdTomato-LTI6b*, on the forming cell plate (arrow). **(B)** Difference in the time to completion of the cellularization between the egg cell and synergid cells (left) and the initiation of the cell elongation from the completion of the cellularization (right) at the FG5 stage. **(C)** Nuclei and plasma membranes were labeled with *RPS5Apro::H2B-sGFP* (green) and *RPS5Apro::tdTomato-LTI6b* (magenta), respectively. Asterisks indicate the two micropylar nuclei at FG4. Arrows indicate the forming cell plate. Polar nucleus (arrowheads) migrated along the forming cell plate. **(D)** Plasma membranes were labeled with *RPS5Apro::tdTomato-LTI6b*. Numbers indicate time (hr:min) from the onset of the observations. AC, antipodal cells; CC, central cell; EC, egg cell; Pn, Polar nucleus; SY, synergid cell. Scale bars, 20  $\mu$ m.



DYNAMICS OF THE CELL FATE SPECIFICATIONS DURING FEMALE GAMETOPHYTE DEVELOPMENT IN *Arabidopsis*

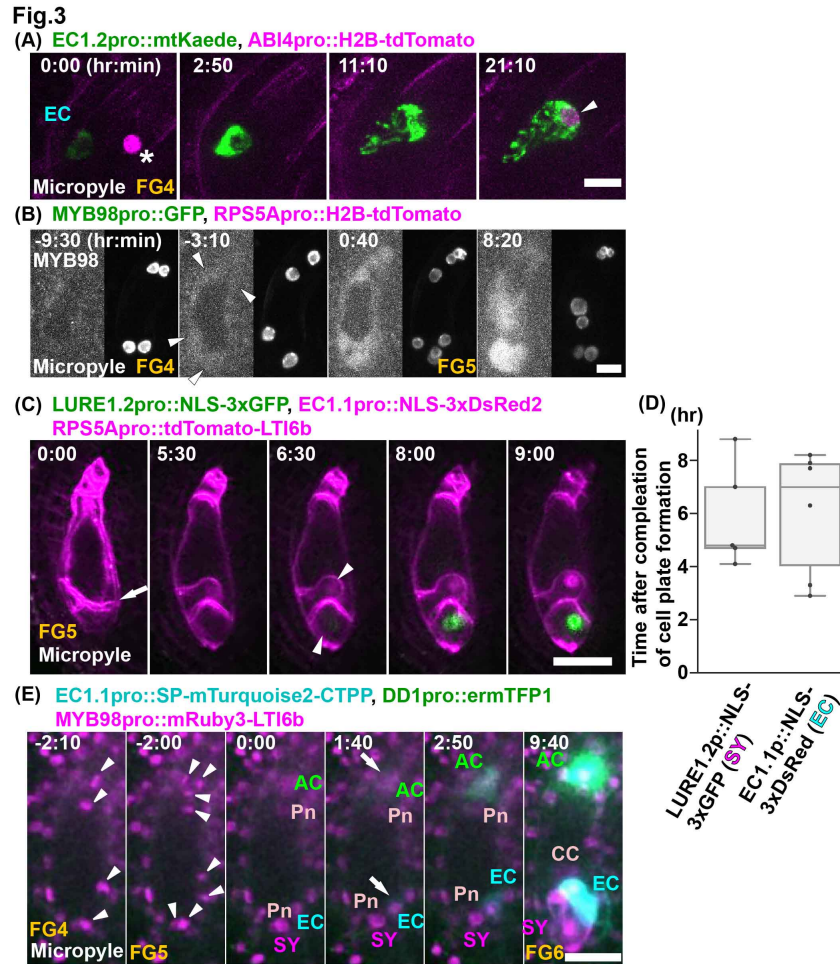

Figure 3: (A) The fluorescent signals of *EC1.2pro::mtKaede* were observed for the egg cell fate. Nuclei were labeled with *ABI4pro::H2B-tdTomato* (magenta). Numbers indicate time (hr:min) from the onset of observation. Asterisk indicates the background signal in the ovule (0:00). Arrowhead indicates the fluorescent signal of *ABI4pro::H2B-tdTomato*. (B) The fluorescent signals of *MYB98pro::GFP* were observed for the synergid cell fate. Nuclei were labeled with *RPS5Apro::H2B-tdTomato*. Numbers indicate time (hr:min) after finishing the polar nuclear movement along the forming cell plate. Arrowheads indicate the first detection of the *MYB98pro::GFP* signals. (C) Nuclei were labeled with *EC1.1pro::NLS-3xDsRed2* (magenta) in the egg cells and *LURE1.2pro::NLS-3xGFP* (green) in the synergid cells, respectively in the *FGR8.0*. The plasma membranes were labeled with the *RPS5Apro::tdTomato-LTI6b* (magenta). Numbers indicate the time (hr:min) after finishing the cell plate formation. Arrow indicates the fluorescent signals of *tdTomato-LTI6b* on the forming cell plate. Arrowheads indicate the initiation of the expression of each cell-specific markers (6 hr 30 min). (D) Initiation of the expression of the cell-specific markers at FG5. The fluorescent signals for *EC1.1pro::NLS-3xDsRed2* in the egg cells and *LURE1.2pro::NLS-3xGFP* in the synergid cells were observed after completion of the cell plate formation (D). (E) Numbers indicate time (hr:min) from the third mitosis. Arrowheads indicate the chromosomes during the third mitosis. Arrows indicate the initiation of the expression of the specific markers of the egg cell (cyan) and the antipodal cells (green) 1 hr 40 min after cellularization. This timing was before the cell expansion and the polar nuclei migration. The *MYB98pro::mRuby3-LTI6b* was detected 6 hr 20 min after cellularization. Scale bars, 10  $\mu$ m (A), 20  $\mu$ m (B).

DYNAMICS OF THE CELL FATE SPECIFICATIONS DURING FEMALE GAMETOPHYTE DEVELOPMENT IN *Arabidopsis*

**Fig.4**

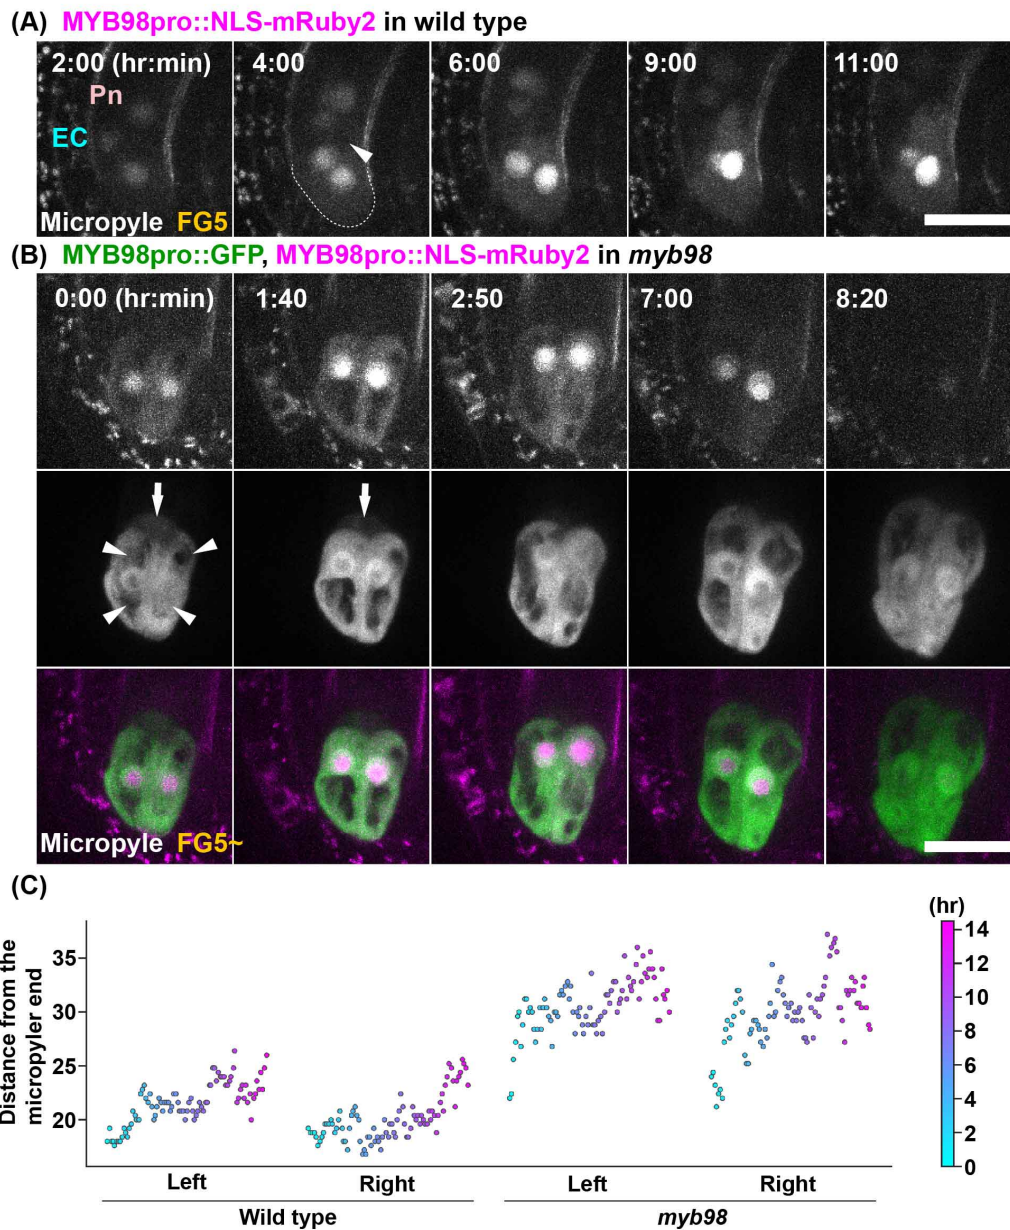

Figure 4: **(A)** Nuclei of the synergid cells were labeled with *MYB98pro::NLS-mRuby2* in the wild type. The numbers indicate the time (hr:min) from the onset of the observations. Dashed lines indicate the surface of the synergid cells at the micropylar end. **(B)** Nuclei of the synergid cells that were labeled with *MYB98pro::NLS-mRuby2* in the *myb98*. The fluorescent signals of the *MYB98pro::GFP* were observed for the synergid cell fate. The arrowheads indicate the vacuoles in the synergid cells. The arrows indicate the GFP signals in the egg cells. Scale bars, 20  $\mu\text{m}$ . **(C)** Nuclei positions on the micropylar–chalazal axis were plotted in each synergid cell in the wild type and *myb98* from the Supplemental Movies S9 and S10. Each point color indicates the time corresponding to the color bar. The leftmost point indicates the start time. The y-axis indicates the distance from the micropylar end of the synergid cell.

DYNAMICS OF THE CELL FATE SPECIFICATIONS DURING FEMALE GAMETOPHYTE DEVELOPMENT IN *Arabidopsis*

Fig.5

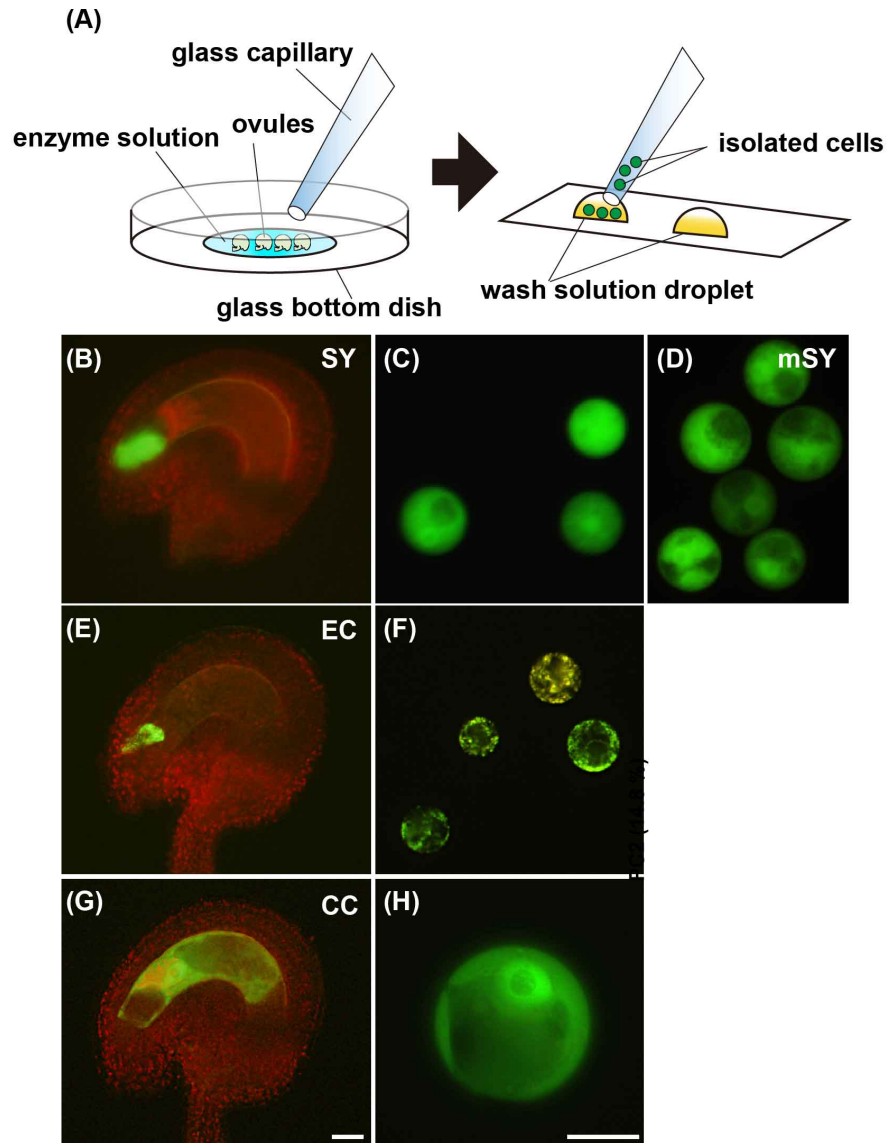

Figure 5: Isolation of the female gametophyte cells. (A) Scheme for the isolation of the female gametophyte cells. The ovules of the marker lines for the synergid (B), egg (E), and central cells (G). The isolated each type of cell. Synergid cells in the wild type (C) and *myb98* mutant (D). (F) Egg cells. (H) Central cell. SY, synergid cell; EC, egg cell; CC, central cell; mSY, synergid cell of *myb98* mutant. Scale bars, 20  $\mu\text{m}$ .

DYNAMICS OF THE CELL FATE SPECIFICATIONS DURING FEMALE GAMETOPHYTE DEVELOPMENT IN *Arabidopsis*

Fig.6

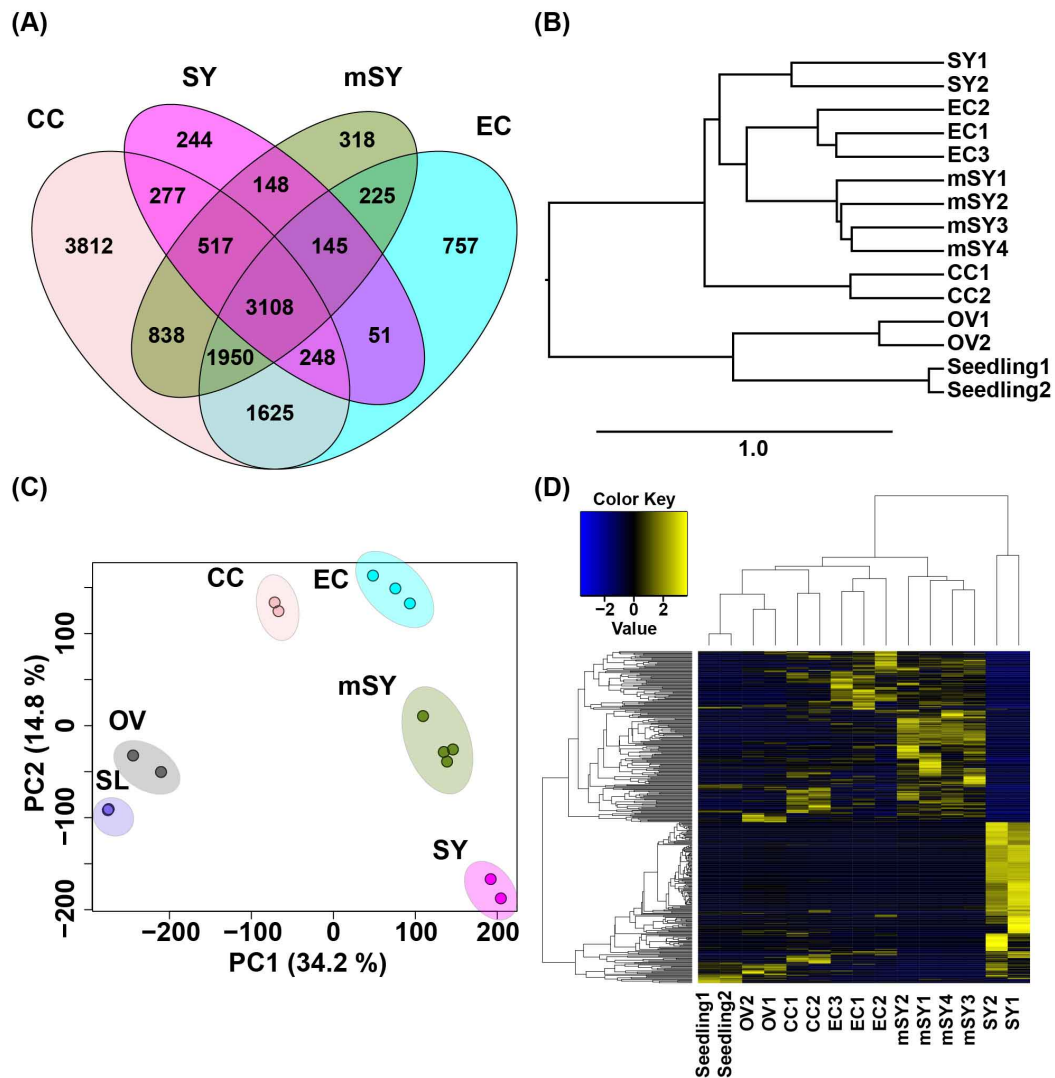

Figure 6: RNA-seq of the female gametophyte cells. The biological replicates were sequenced for the two SY, two CC, three EC, and four mSY cells. **(A)** Hierarchical clustering of samples for the RNA-seq. **(B)** The PCA analysis of all transcriptome data, the female gametophyte cells, ovules and seedlings. **(C)** Venn diagram of the expressed genes (> 10 reads) in each cell type. **(D)** Heatmap of the differentially expressed genes between the synergid cells in the wild type and the *myb98* mutant. OV, ovule; SL, seedling.

DYNAMICS OF THE CELL FATE SPECIFICATIONS DURING FEMALE GAMETOPHYTE DEVELOPMENT IN *Arabidopsis*

Fig.7

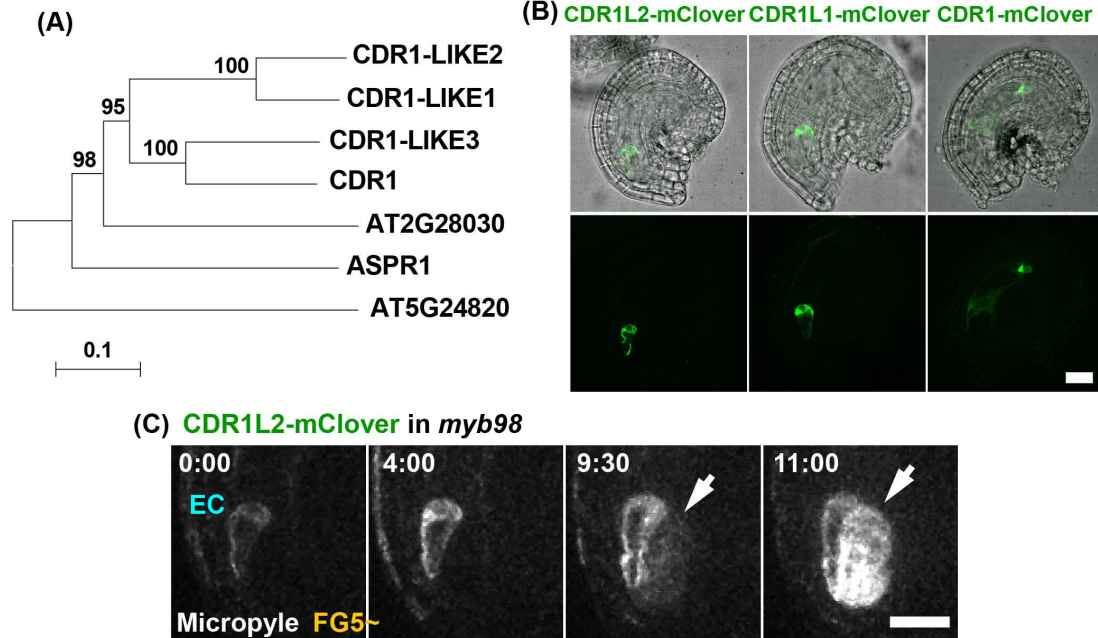

Figure 7: (A) Phylogenetic tree of the aspartyl proteases in the *Arabidopsis thaliana*. (B) The expression patterns of the *CDR1L2-mClover* and *CDR1L1-mClover* were detected in the egg cell. The fluorescent signal of the *CDR1-mClover* was detected in the central cell and the antipodal cells. (C) The expression of the *CDR1L2-mClover* in the *myb98* mutant ovules. The numbers indicate the time (hr:min) from the onset of the observations. The arrow indicates the *CDR1L2-mClover* signals in the synergid cell of the *myb98*. Scale bars, 20  $\mu\text{m}$ .

DYNAMICS OF THE CELL FATE SPECIFICATIONS DURING FEMALE GAMETOPHYTE DEVELOPMENT IN *Arabidopsis*

Fig.8

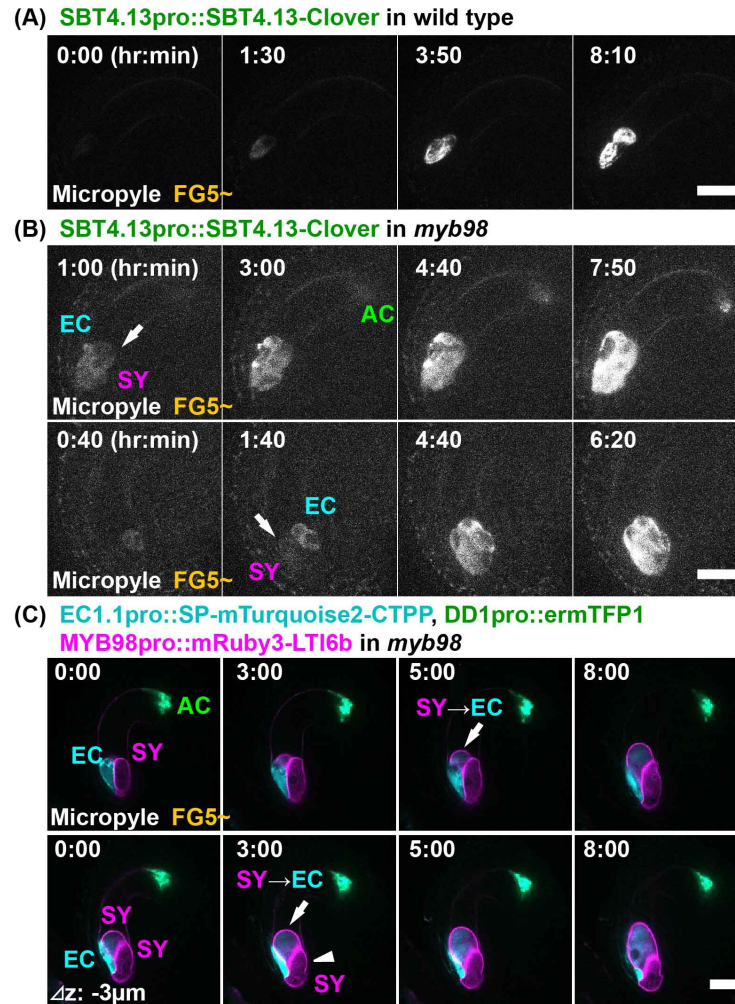

Figure 8: (A,B) The expression patterns of the *SBT4.13pro::SBT4.13-mClover* in the wild type (A) and *myb98* (B) mutant ovules. The numbers indicate the time (hr:min) from the first detection of the *SBT4.13-mClover*. The fluorescent signals of the *SBT4.13-mClover* were only detected in the egg cells of the wild type. (A). However, in the case of the *myb98*, the fluorescent signals of the *SBT4.13-mClover* were also detected in the synergid cells (B; upper) and the antipodal cells (B; lower). (C) The expression patterns of the female gametophyte-specific markers in the *myb98*. The numbers indicate the time (hr:min) from the onset of the observations. At first, the *MYB98pro::mRuby3-LTI6b* were detected in the two synergid cells (0:00). The arrows indicate the *EC1.1pro::SP-mTurquoise2-CTPP* expression in one of the synergid cells (3 hr 00 min, 5 hr 00 min). The arrowhead indicate no expression of the *EC1.1pro::SP-mTurquoise2-CTPP* (3 hr 00 min). The upper and lower panels are different z planes. Scale bars, 20 μm.

DYNAMICS OF THE CELL FATE SPECIFICATIONS DURING FEMALE GAMETOPHYTE DEVELOPMENT IN *Arabidopsis*

**Fig.9**

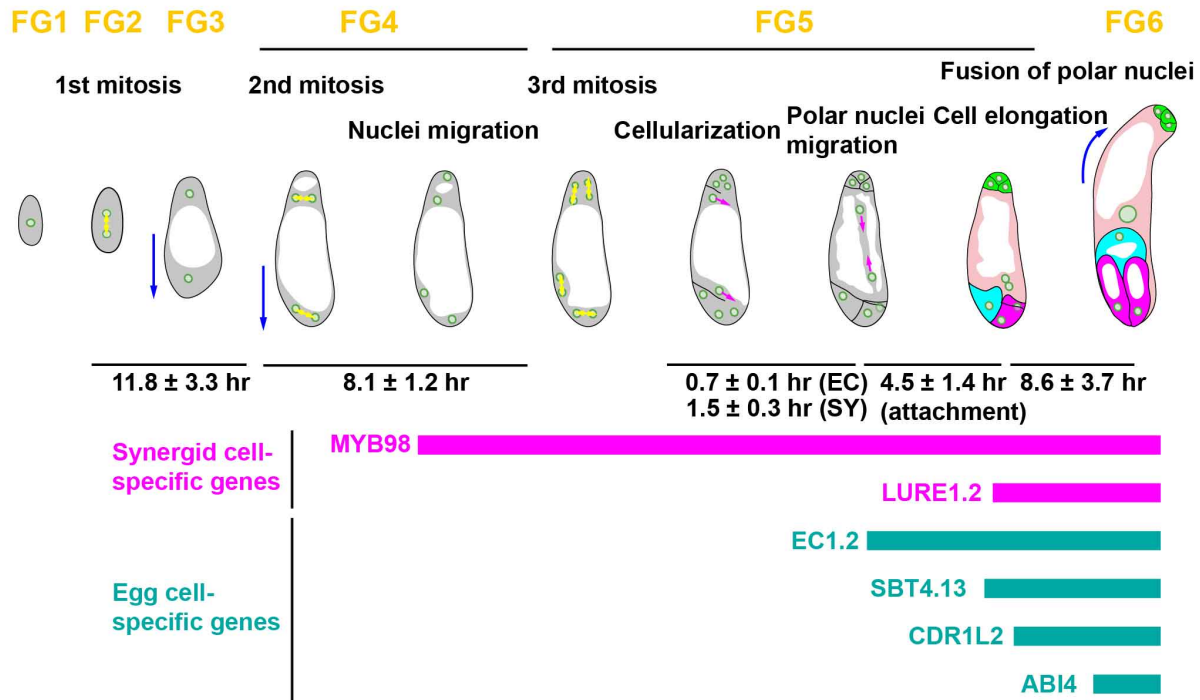

Figure 9: Schematic illustration of dynamics of the female gametophyte development in *Arabidopsis*. Yellow arrows show the direction of nuclear divisions. Blue arrows show the direction of cell elongation of the female gametophyte. Magenta arrows show polar nuclear migration at FG5. The time (mean  $\pm$  standard deviation) calculated from the movies.

DYNAMICS OF THE CELL FATE SPECIFICATIONS DURING FEMALE GAMETOPHYTE DEVELOPMENT IN *Arabidopsis*

| Construct          | MYB98 genotype | Expression   |             |            |
|--------------------|----------------|--------------|-------------|------------|
|                    |                | EC           | EC, SY      | EC, SY, AC |
| CDR1-LIKE2pro::    | +/+            | 6/6 (100 %)  | 0           | 0          |
| CDR1-LIKE2-mClover | -/-            | 0            | 9/9 (100%)  | 0          |
| SBT4.13pro::       | +/+            | 10/10 (100%) | 0           | 0          |
| SBT4.13-mClover    | -/-            | 1/23 (4%)    | 15/23 (65%) | 7/23 (30%) |

Table 1: Expression of EC-specific genes in the female gametophyte cells

| Construct          | MYB98 genotype | Expression   |             |            |
|--------------------|----------------|--------------|-------------|------------|
|                    |                | EC           | EC, SY      | EC, SY, AC |
| CDR1-LIKE2pro::    | +/+            | 6/6 (100 %)  | 0           | 0          |
| CDR1-LIKE2-mClover | -/-            | 0            | 8/9 (89%)   | 1/9 (1%)   |
| SBT4.13pro::       | +/+            | 10/10 (100%) | 0           | 0          |
| SBT4.13-mClover    | -/-            | 1/23 (4%)    | 17/23 (74%) | 5/23 (22%) |

Table 2: Number of mutated synergid cells with EC-specific gene expressions
